# Supplementary material for: The perception of palaeontology in commercial off-the-shelf video games and an assessment of their potential as educational tools
Source: Copernicus journal article supplement (doi:10.5194/egusphere-2022-84), 2022-04-14

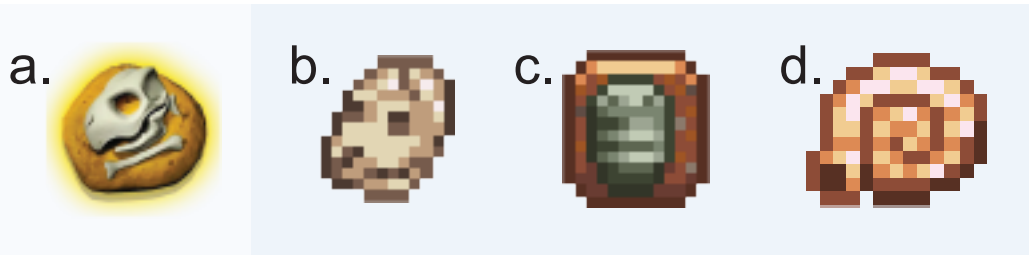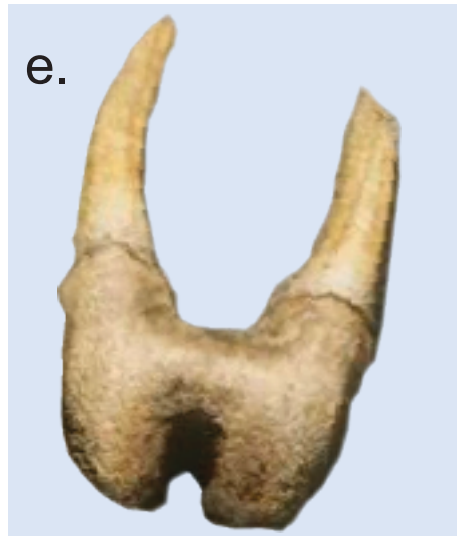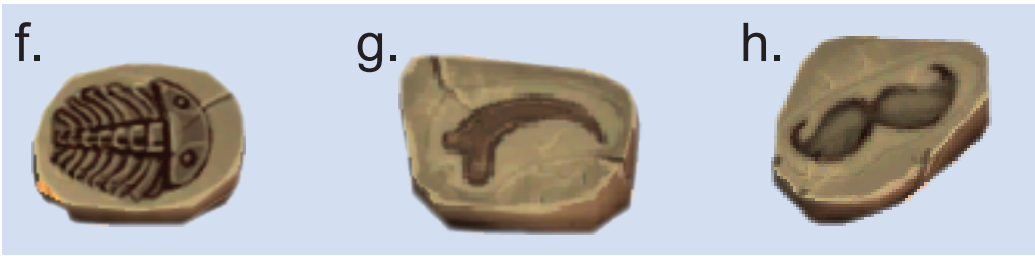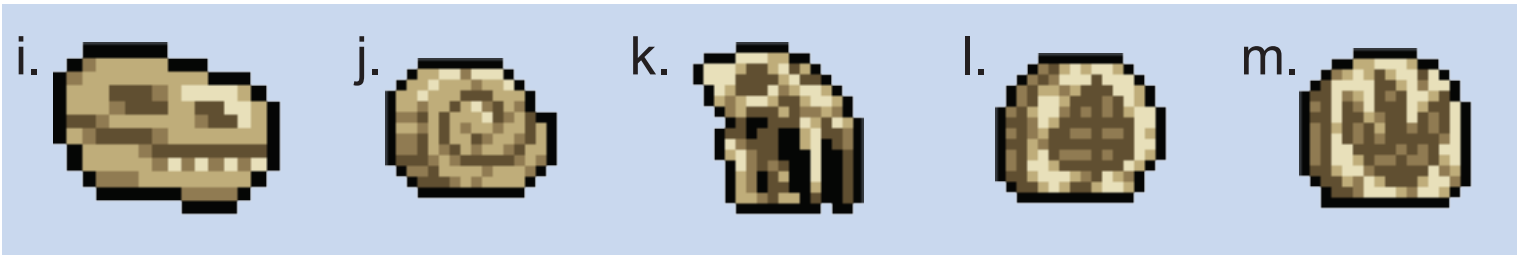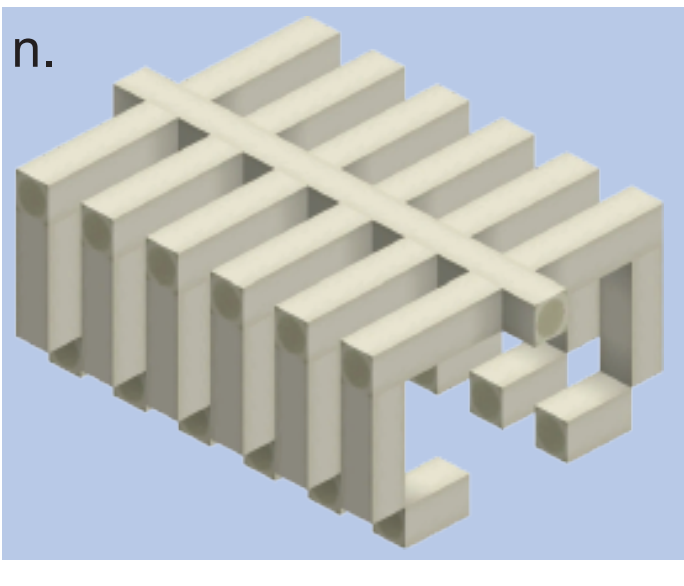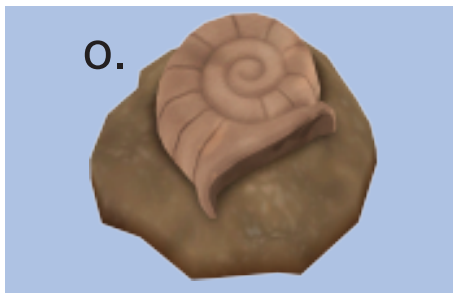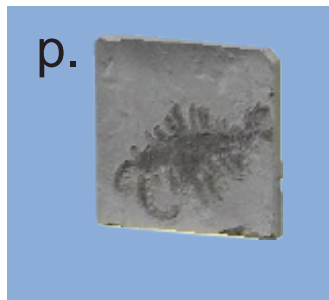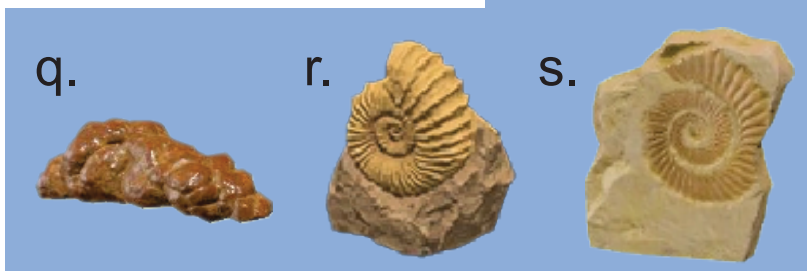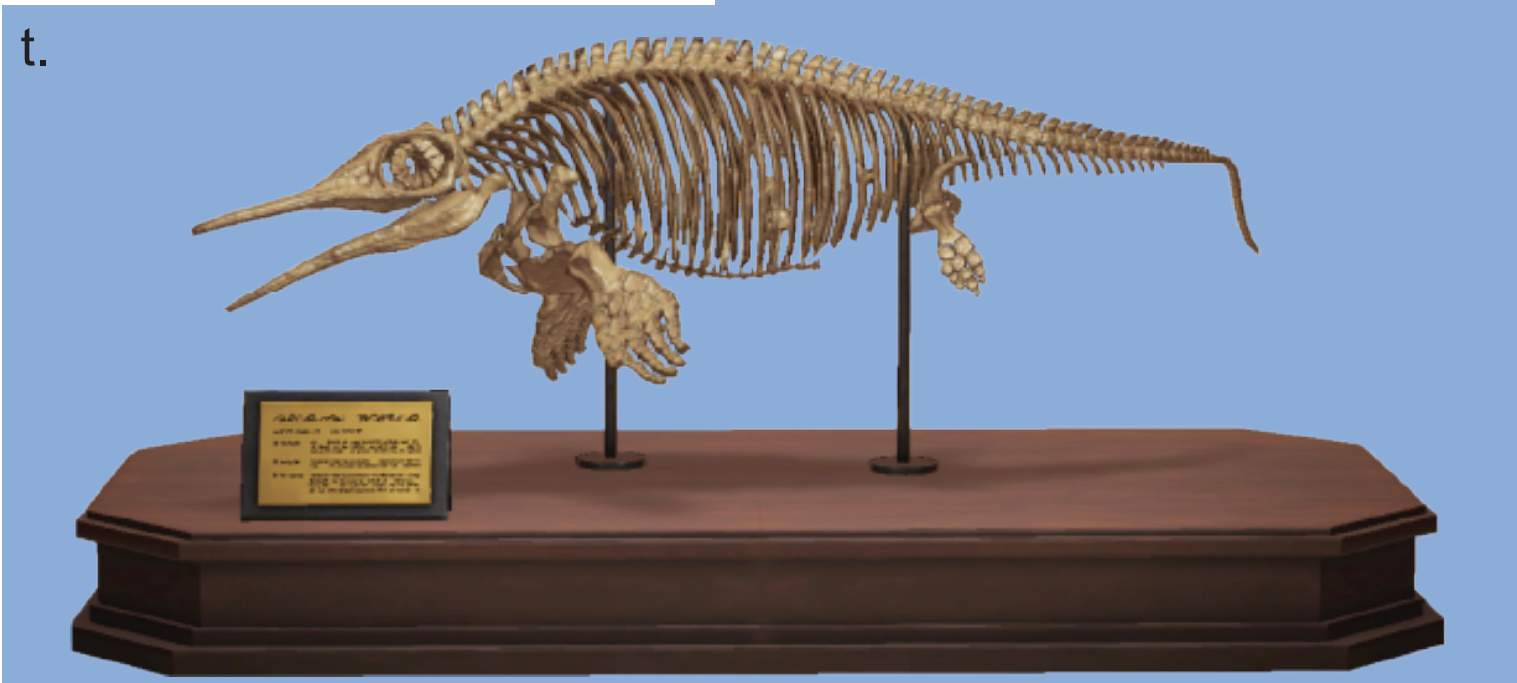

Supplement: Supplementary file [file egusphere-2022-84-AC4-supplement.pdf]
