# Supplementary material for: The perception of palaeontology in commercial off-the-shelf video games and an assessment of their potential as educational tools
Source: Copernicus journal article supplement (doi:10.5194/egusphere-2022-84), 2022-04-14
Supplement: Supplementary file [file egusphere-2022-84-RC1-supplement.pdf]

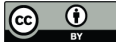

1 ***The perception of palaeontology in commercial off-the-shelf video games and an***  
2 ***assessment of their potential as educational tools.***

3 Thomas Clements <sup>\*1†</sup>, Jake Atterby <sup>\*1†</sup>, Terri Cleary<sup>1,2</sup>, Richard P. Dearden <sup>1</sup>, and Valentina  
4 Rossi<sup>3,4</sup>.

5 1: School of Geography, Earth and Environmental Sciences, University of Birmingham, Birmingham, B15  
6 2TT, UK

7 2: Independent researcher

8 3. Museo di Scienze Naturali dell'Alto Adige, Bolzano, 39100, Italy

9 4. School of Biological, Earth and Environmental Sciences, University College Cork, Cork, T23 TK30,  
10 Ireland

11 <sup>\*</sup>Joint first authors.

12 <sup>†</sup> Corresponding author. clements.taph@gmail.com

13

14 *Video games now comprise the largest sector of the media entertainment industry. Hundreds of*  
15 *video games, spanning a huge variety of genres and platforms, use extinct animals and/or*  
16 *palaeontological themes as a basis for their gameplay. Because of this, many players, especially*  
17 *children, spend long periods of time engaging with, and immersed in, palaeontological concepts*  
18 *and themes. ~~Indeed,~~ video games may be the first medium of implicit or tangential science*  
19 *communication they engage with, especially with regards to palaeontology. However, commercial*  
20 *off-the-shelf video games are not primarily designed to be educational tools, and the proliferation*  
21 *of some common tropes can disseminate harmful and/or unethical (mis)information regarding*  
22 *palaeontology. This paper introduces the major types of palaeontological video games and*  
23 *discusses their educational potential. ~~Moreover,~~ we highlight the most common palaeontological*  
24 *tropes observed in video games, both positive and negative, to better inform science*  
25 *communicators about the perception of palaeontology (and ancient animals) in this massively*  
26 *influential medium. Furthermore, by highlighting common misconceptions and harmful tropes we*  
27 *aim to bring awareness to game developers who may be unaware that they could be propagating*  
28 *negative tropes about palaeontological science.*

29

30 ***1. Introduction***

31 Video games are the largest and fastest growing sector of the media entertainment industry. In  
32 2020, approximately 2.7 billion users generated an estimated \$159.3 billion in revenue, more  
33 revenue than the movie and music industry combined (Newzoo Global Games Market Report,  
34 2020). The rise of games playable on mobile devices has massively increased the accessibility

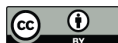

35 of video games to a broad range of demographics, mainly because they do not require specialist  
36 hardware, are often free-to-play, and have huge diversity in regard to subject matter and  
37 necessary skill level. Furthermore, gaming related entertainment, such as live-streaming services  
38 like the websites Mixer, Twitch, YouTube etc., are hugely popular, with over 12.4 billion hours of  
39 gaming live-streams consumed in the first two quarters of 2020 (Stream Hatchet Video Game  
40 Streaming Trends Report, 2020). Combined, this indicates that not only are video games  
41 increasing in popularity but that, when not playing, many users will still engage with video games  
42 by watching others play online via streaming services. As palaeontological science  
43 communicators, we should appreciate the size of the captive audience, and how influential the  
44 medium of video games is as a resource for engagement practices.

45 Broadly speaking, video games can be separated into two categories: educational and  
46 commercial games. Educational games actively promote learning by introducing information and  
47 engaging the user with specific content, known as 'Digital Game Based Learning' (DGBL; see  
48 Habgood & Ainsworth, 2011). Video games that focus on specific STEM subjects have been  
49 shown to be beneficial to both non-students and students by positively aiding learning outcomes  
50 (e.g. Shute *et al.* 2013; Mani *et al.* 2016; Pringle *et al.* 2017 etc.), especially for students who  
51 struggle with traditional teaching practices (Mayo, 2009). However, studies also indicate that  
52 some users can find educational games patronising (Klopfer & Osterweil, 2013), or lose interest  
53 rapidly and disengage, decreasing the likelihood of positive learning outcomes (Kerawalla &  
54 Crook, 2005; Habgood & Ainsworth 2011). Furthermore, educational video games are typically  
55 niche in their subject matter, difficult to programme (e.g. Pringle *et al.* 2017), difficult to implement  
56 (e.g. Mani *et al.* 2016; Mozelius *et al.*, 2017), and require extensive funding to develop (Annetta,  
57 2008; Mayo, 2009). These games are often made in association with specific outreach projects  
58 with limited funding (e.g. Mani *et al.* 2016; Pringle *et al.* 2017), making protracted development  
59 an impossibility (Mayo, 2009). It should also be noted that it can be difficult to monitor the  
60 educational effectiveness of these educational video games (e.g. Mani *et al.* 2016) especially if  
61 they are released to the public. Ultimately, educational video games are viable learning aids, but  
62 they do not appeal to the wider public.

63 The second type of video games are commercial-off-the-shelf (COTS) games. These  
64 games make up the overwhelming majority of the gaming ecosystem and are incredibly diverse  
65 in their genres and themes. Typically, COTS games are developed to a much higher standard of  
66 graphics and gameplay mechanics than educational video games (Kerawalla & Crook, 2005;  
67 Mozelius *et al.*, 2017) and are designed specifically to capture the attention of the user by  
68 motivating and challenging them in an interactive environment, often reinforcing this through

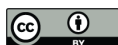

69 repetition and reward (Brown *et al.* 2014). Despite the dated perception that video games are  
70 nothing more than a trivial time sink, evidence suggests that video games can have positive  
71 benefits to cognition, motivation, and social skills in players (e.g. Granic *et al.* 2014). Furthermore,  
72 COTS games can effortlessly provide early exposure to educational themes and concepts, even  
73 if the specific COTS game is not primarily designed for this purpose. Because of the huge variety  
74 in genres, engaging gameplay, ability to play online with friends, and high production quality, it  
75 has been proposed that COTS games are a resource that could be incorporated into teaching  
76 environments (Van Eck, 2006), with multiple studies undertaking utilising COTS in teaching  
77 environments (e.g. Charsky & Mims, 2008; Mohanty & Cantu, 2011; Sun *et al.* 2015; Cadwell *et*  
78 *al.* 2017 etc.). Recently, some COTS games have included specific sections of the game that are  
79 focused on education: for example, *Assassin's Creed: Origins* (2017, Ubisoft Montreal) and later  
80 instalments in the *Assassin's Creed* franchise contain a 'Discovery Tour' mode that removes  
81 combat and quests in the game to allow players to explore the games' historical settings  
82 accompanied with factual information and quizzes. Generally speaking, however, whilst  
83 educational video games often sacrifice entertainment for accuracy, many COTS video games do  
84 the opposite (Van Ecy; 2006 Mozelius *et. al.*, 2017; McGowan & Scarlett, 2021), and therefore  
85 must be carefully vetted prior to integration into curricula, often leading to increased workload for  
86 educators (e.g. Sun *et al.* 2015; Cadwell *et al.* 2017 etc.).

87 One important and often overlooked aspect of computer gaming is the potential for implicit  
88 and tangential learning (Mozelius *et al.*, 2017; McGowan & Scarlett, 2021). Implicit (or  
89 unconscious) learning occurs when learning takes place in an incidental manner without the  
90 awareness of the person engaging in an activity (e.g. Frensch & R nger, 2003). Conversely,  
91 tangential learning is the semi-conscious process of self-education via exposure to a topic in an  
92 already enjoyable, non-educational format (Brown *et al.* 2014). Many COTS games impart  
93 complex scientific and historical content to their audiences by presenting the topic within fun and  
94 engaging game mechanics in a non-scholastic format. However, it is also possible that any implicit  
95 and tangential learning from a COTS game may be a completely unintended or entirely accidental  
96 element of game design. Consequently, because COTS games are not primarily designed with  
97 educational purposes in mind, inaccuracies either intentional (disinformation), or unintentional  
98 (misinformation), can be incredibly impactful to less informed players, and can mislead audiences  
99 about key concepts and even reinforce harmful stereotypes.

100 This is particularly pertinent to the science communication community, and especially so  
101 in the field of palaeontology. For over 150 years, ancient organisms have inspired a plethora of  
102 popular books, films, cartoons and toys. It should therefore be of no surprise that ancient life is a

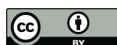

103 popular topic for the video game industry. In fact, one of the first 3D games for the home computer  
104 was *3D Monster Maze* (1982, J. K. Greye Software), a maze game where the player was chased  
105 and, unless they could successfully escape, eaten by a *Tyrannosaurus rex* (Figure 1). Since then,  
106 the diversity of palaeontological video game genres has greatly increased and is currently a  
107 popular theme for COTS games. This means that a considerable number of people, particularly  
108 children, will be introduced to the field of palaeontology through the medium of video games.  
109 Because players repeatedly engage with a single video game and new games that contain  
110 palaeontological themes are being released all the time, COTS games have a much greater reach  
111 than traditional outreach events.

112 The aim of this paper is in  parts: 1) to familiarise science communicators with the  
113 types of palaeontological COTS video games; 2) to identify and discuss common tropes and  
114 misconceptions that often arise where scientific accuracy is compromised for entertainment value.  
115 This paper seeks to raise awareness to science communicators of the perception of  
116 palaeontology (and ancient animals) that the video game-playing public are exposed to, especially  
117 those that have been introduced to the subject via these games. Furthermore, we highlight  
118 harmful tropes (i.e. unethical behaviour, misogyny, racism etc.) to inform science communicators,  
119 COTS game writers, developers, and video game artists who may be unaware that they are  
120 propagating damaging tropes pertaining to palaeontological science.

121

## 122 **2. General introduction to palaeontological video games genres**

123 There is a huge diversity of video games that contain palaeontological content. In this review, we  
124 focus on COTS video games that incorporate fossils and/or ancient animals as one of the playable  
125 or interactive aspects of the game. In this review we do not discuss COTS games that only  
126 incorporate ancient animals as 'set dressing'. Examples include games such as *The Last Of Us*  
127 *Part II* (2020, Naughty Dog), *Batman: Arkham City* (2011, Rocksteady Studios), and *BioShock*  
128 (2007, 2K Boston) that feature levels in museums containing skeletons or animatronic replicas of  
129 extinct animals, or *Battlefield 4* (2013, DICE), which features a hidden 'easter egg' that allows the  
130 players to summon a giant *Otodus megalodon* during live multiplayer matches. Another common  
131 use of ancient animals is purely cosmetic; many multiplayer games feature 'skins' that the players  
132 can unlock to customise their characters, and these often resemble ancient animals e.g. dinosaur  
133 outfits in *Fortnite* (2017, Epic Games), and dinosaur themed armoured suits in *Destiny 2* (2017,  
134 Bungie Inc.) (Figure 2). These 'skins' are purely aesthetic changes that do not alter the core  
135 gameplay and will not be discussed further.



136 In order to understand the tropes commonly seen in palaeo-video games, it is important  
137 to identify the major categories of **palaeo-video games** that are available on the market. Despite  
138 the diversity of game types and styles (Figure 3), most games align with one of the following  
139 categories (though some span multiple): 1) ancient animals as adversaries (Figure 2a); 2) ancient  
140 animals as tools (Figure 2b); 3) fossils as **collectables** (Figure 2c); 4) ancient animal management  
141 simulators (Figure 2d); and 5) ancient animal simulators (Figure 2e).

142

### 143 2.1 Ancient animals as adversaries

144 This category is, by far, the most common type of palaeontological video game (Figure 3d). Many  
145 video games use ancient animals (typically dinosaurs and pterosaurs) as adversaries that must  
146 be defeated (i.e., killed) in order for the player to proceed and continue the game. In this type of  
147 game, the ancient animals are programmed to be hostile if approached and/or will actively hunt  
148 the player. Examples include *The Legend of Zelda* (1986, Nintendo EAD), *Turok: Dinosaur Hunter*  
149 (1997, Iguana Entertainment; Figure 2a), *Trespasser* (1998, DreamWorks Interactive), *Dino Crisis*  
150 (1999, CAPCOM), *Tomb Raider* (1996, Core Design), *Peter Jackson's King Kong: The Official*  
151 *Game of the Movie* (2005, Ubisoft Montpellier), *etc.*

152 Another type of palaeo-video game that falls within this category is the 'wave shooter', in  
153 which the player fights off waves of hostile enemies with a suite of exotic weapons in order to  
154 progress. The enemies in these games are presented as cannon fodder that exhibit little or no  
155 natural behaviour, swarming en masse to overwhelm the player. Examples include *Dino Stalker*  
156 (2002, CAPCOM), *Dino D-Day* (2011, Digital Ranch), *Dinosaur Hunt* (2015, Racing Bros),  
157 *Carnivores: Dinosaur Hunter (Reborn)* (2015, Digital Dreams Entertainment LLC), *Wrath of the*  
158 *Goliaths: Dinosaurs* (2018, Ascendence Studios), *Hunt: Primal Reptiles* (2020, HugeLittleStudio),  
159 *Prehistoric Hunt* (2020, Antiproto Studios), and *Second Extinction* (2020, Systemic Reaction).  
160 Some games subvert this genre and allow the option to play as the ancient animals in order to  
161 hunt and kill humans, such as *Primal Carnage* (2012, Lukewarm Media) and *Orion Prelude* (2012,  
162 DANKIE).

163 Generally, category 1 games offer very limited educational content. At best, the player can  
164 access a glossary of the hostile units which may contain some scientific information, however,  
165 many of these games rely heavily on tropes such as monsterification to make the enemies appear  
166 and behave more frightening or lethal. In fact, in most category 1 games, the ancient animals  
167 could be replaced by any other generic adversaries (e.g. aliens or zombies) with little impact to  
168 the core gameplay.

169



## 170 2.2 Ancient animals as tools

171 Another common use of ancient animals in COTS games is as a tool to help the player progress  
172 through the game. One of the most famous and recognisable examples is Yoshi, a fictional  
173 omnivorous theropod dinosaur who first appeared in *Super Mario World* (1990, Nintendo EAD;  
174 Figure 2b). Yoshi was a mount for the Mario brothers in their adventures to rescue Princess  
175 Peach, but Yoshi's popularity promoted him to full sidekick status and has spawned several  
176 dedicated sequels (e.g. *Yoshi's Story*, 1997, Nintendo EAD). A variety of other games allow tamed  
177 ancient animals to be utilised as mounts, such as *Far Cry Primal* (2016, Ubisoft Montreal), *Ark:*  
178 *Survival Evolved* (2017, Studio Wildcard), *Total War: Warhammer I and II* (2016, 2017, Creative  
179 Assembly), and *World of Warcraft: Battle for Azeroth* (2018, Blizzard Entertainment), with some  
180 games even going so far as to mount weapons such as machine guns and cannons, to ancient  
181 animals e.g. *Nanosaur* (1998, Ideas From the Deep), *Dino D-Day*, and *Total War: Warhammer II*.

182 Ancient animals as tools are also featured in the COTS game sub-genre role-playing  
183 games (RPGs). In the context of palaeontology, the most famous examples are the *Pokémon*  
184 games, in which a diverse group of Pokémon are based on or inspired by ancient animals. In  
185 these games the player can catch, train, and fight the creatures in sanctioned competitions in  
186 order to become the best trainer in their respective worlds. Pokémon fossils can be found, revived,  
187 and used to battle other trainers as the player progresses through the game (e.g. *Pokémon*  
188 *Red/Blue*, 1999, Game Freak). Similarly, the *Fossil Fighters* series (2008, Nintendo EAD) allows  
189 players to take part in detailed fossil excavations, revive the discovered dinosaurs (referred to as  
190 vivosaurs), and train them to fight in order to complete the main story.

191 Similar to category 1 games, category 2 games have very limited educational content but  
192 may have some information about the ancient animals in databases or glossaries.

193

## 194 2.3 Fossils as collectables

195 Collectables are a common aspect of COTS games: items found throughout the game setting that  
196 the player can collect as they progress and explore through the game. These collectables are  
197 often an optional side quest separate to the main storyline, that provide additional worldbuilding  
198 or upgrades, but which in some games are used as resources to craft tools and materials.

199 Fossils are frequently a form of collectible seen in COTS games. For example, *Red Dead*  
200 *Redemption 2* (2018, Rockstar Games), features a side quest where the player is tasked to locate  
201 30 fossil specimens across the game world in order to assist an aspiring palaeontologist. Another  
202 example is in the *Pokémon* franchise; as mentioned above, fossils can be found and resurrected  
203 by the player in order to complete the secondary objective of the game; filling the digital *Pokémon*



204 encyclopaedia, or Pokédex, with every type of Pokémon that can be found in the game world (e.g.  
205 *Pokémon Red/Blue*).

206 Most other games use fossils as a natural resource, alongside crystals, ore, geodes etc.  
207 that can be used to collect, sell, or build other objects. In *Minecraft* (2011, Mojang), *The Sims 4*  
208 (2014, Maxis), *Starbound* (2016, Chucklefish), *Stardew Valley* (2016, ConcernedApe), and  
209 *Animal Crossing: New Horizons* (2020, Nintendo EAD; Figure 2c) players can collect fossils for a  
210 variety of reasons — from displaying in virtual museums or in their own personal collections, to  
211 even being used as fertiliser! However, in the majority of category 3 games, fossils are also used  
212 as (or associated with) in-game financial resources as a tradable commodity. This has  
213 implications for the public perception of fossil collecting (see *Representing ethics in*  
214 *palaeontology*).

215 Virtual fossil collectibles are almost always based on real organisms and often include  
216 database entries or facts pertaining to the items that can be collected. This has enormous  
217 potential for educating the player, provided the information is well researched. However, category  
218 3 games can easily impart misinformation or even disinformation especially when presented in an  
219 otherwise informative context.

220

#### 221 *2.4 Ancient animal management simulators*

222 ‘Construction and management simulations’, sometimes referred to as park management  
223 simulators (or park sims) are games where the goal is to construct a financially viable park or zoo  
224 by managing the construction, park layout, guest management, animal welfare, and breeding  
225 programmes with often very limited resources. Ancient animals tend to be a common focus for  
226 park sim games, and they often have a diverse variety of organisms that are modelled realistically  
227 and tend to exhibit ‘naturalistic’ behaviours (although some games are heavily stylized and/or  
228 simplistic for aesthetic reasons) for the player to engage with. There have been several park sim  
229 games based on the Jurassic Park franchise, e.g. *Jurassic Park III: Park Builder* (2001, Konami),  
230 *Jurassic Park: Operation Genesis* (2003, Blue Tongue Entertainment), *Jurassic Park Builder*,  
231 (2012 Ludia) and *Jurassic World: Evolution* (2018, Frontier Developments; Figure 2d), but  
232 independent franchises based on ancient animals are also popular e.g. *DinoPark Tycoon* (1993,  
233 Manley & Associates), *Zoo Tycoon: Dinosaur Digs* (2002, Blue Fang Games), and *Parkasaurus*  
234 (2020, Washbear Studio).

235 Category 4 games often contain the most detailed compendiums on ancient organisms,  
236 allowing the player to find information regarding their required virtual living conditions and about  
237 the relevant science and/or discovery of the organism. They can also contain detailed information



238 about fossil sites, fossilisation processes, phylogenetic relationships, and evolutionary processes.  
239 As with previous categories, this information can yield useful educational content if accurate, but  
240 be misleading if incorrect or disinformation is presented.

241

### 242 *2.5 Ancient animal simulators*

243 The last decade has seen the emergence of ‘survival simulators’ — games where the player can  
244 control an individual animal through an entire life cycle in a natural, open world, environment.  
245 While many COTS games allow the player to play as an ancient animal e.g. *Yoshi’s Story*, *Project*  
246 *Bolan (Dinosaur Game)* (2014, Google), *DinoRun DX* (2015, PixelJAM Games) etc. within such  
247 games, the player’s avatar could be replaced by any other organism without altering the gameplay  
248 experience and are not the focus of this category.

249 In survival simulators, the player’s ancient animal avatar must survive by finding water and  
250 food (by hunting A.I. controlled animals or potentially other players) while avoiding natural hazards  
251 and being predated themselves. Typically these games have focused on dinosaurs e.g. *Saurian*  
252 (2017, Urvogel Games, LLC; Figure 2e), *The Archotek Project* (2017, The Archotek Project  
253 Team), *Beasts of Bermuda* (2018, Sastrei Studios, LLC), *Dinosaurs: Prehistoric Survivors* (2018,  
254 Arcupion Art), *The Beasts of 9500* (2020, Dragons), and *Path Of Titans* (2020, Alderon Games)  
255 etc., however, some games do focus on non-dinosaurian animals groups such as early hominids  
256 e.g. *Ancestors: The Humankind Odyssey* (2019, Panache Digital Games). Survival simulators  
257 tend to market themselves as being as scientifically accurate as possible in both their palaeo-  
258 environmental and animal reconstructions (e.g. *Saurian*).

259 Another genre of game that fits within this category allows the player to visit ancient  
260 ecosystems as a passive observer. Video games such as *Abzû* (2016, Giant Squid Studios), allow  
261 the player to swim through ocean environments inhabited by a plethora of ancient aquatic  
262 organisms from throughout geological time. *Robinson: The Journey* (2016, Crytek) utilises virtual  
263 reality headset technology to create an immersive experience for the player who must journey  
264 through a world inhabited by dinosaurs. This genre of game introduces the player to a diverse  
265 range of flora and fauna from the ancient past but is relatively uncommon.

266

### 267 **3. Common palaeontological video game tropes**

268 Within the context of this paper, a ‘trope’ is a recurring theme or motif that occurs across video  
269 games. Although many tropes are considered clichés, they are still commonly used throughout  
270 popular entertainment as recognisable touchstones to provide familiarity to the audience. Many  
271 tropes seen in COTS video games are shared across the entertainment industry (especially in





272 television and film), however, due to the interactive medium of video games, some tropes are  
273 unique to the format. Here we identify some of the most common tropes that appear in video  
274 games, to highlight how palaeontological science is represented in pop-culture and the  
275 entertainment industry, and to demonstrate that some tropes propagated by the video game  
276 industry may be scientifically misleading and/or perpetuate harmful stereotypes.

277

### 278 3.1 Ancient death machines: monsterification

279 The most frequent use of ancient animals in video games is as enemies for players to combat.  
280 Typically, these animals are designed to appear vicious, frightening, and brutish and this known  
281 as 'monsterification'. This is often achieved by 'shrink wrapping' (reducing the organisms' soft  
282 tissue until they are just skin and bone), increasing the animals body size to exaggerated  
283 proportions, and grotesquely exaggerating features like claws, teeth, and horns. However,  
284 monsterification is not limited to an organism's appearance — it can also include behaviour such  
285 as being unrealistically aggressive, erratic and, most often, mindlessly and noisily torpedoing  
286 towards their prey. By consciously combining these aspects, ancient animals are made to appear  
287 more terrifying while also physically dissociated from real animals, meaning that players have a  
288 guilt-free experience slaughtering them. Interestingly, Jański (2016) found that when extant  
289 animals were used as background assets or companions for the player in video games, they were  
290 more likely to be accurately represented, whereas when animals were depicted as enemies or  
291 tools, their appearance and behaviour was more likely to be inaccurate, exaggerated, objectified  
292 and even monsterified. Indeed, some games actively task the player to 'monsterify' ancient  
293 animals: *Jurassic World: Evolution* encourages the player to breed dinosaurs to create hyper  
294 aggressive monsters in order to have them fight each other for the entertainment of park guests.

295 Monsterification is not a novel concept nor is it unknown to science communicators. From  
296 as early as the 19th century, palaeo-reconstructions have liberally and creatively portrayed  
297 ancient life provocatively as monsters to stir the imagination and these images have permeated  
298 into modern popular culture. However, for science communicators there are some important  
299 aspects of monsterification that are not normally considered: 1) Monsterification is not restricted  
300 to carnivorous animals in video games. Examples such as *Orion Prelude*, *Dinosaur Hunt* and  
301 *Second Extinction* etc. utilise hyper aggressive herbivores such as stegosaurus, ceratopsians, and  
302 ankylosaurus as opponents for the player to dispatch; 2) Monsterification is not limited to dinosaurs.  
303 For example, *ARK: Survival Evolved* applies some degree of monsterification to almost every  
304 animal in the game - several taxa are much larger than their fossil remains indicate (e.g.  
305 *Diplocaulus*, *Paraceratherium* etc.), while the giant fish taxon, *Leedsichthys*, is coated in jagged



306 spikes and scutes, and is depicted as highly aggressive despite fossil evidence suggesting they  
307 were filter feeding organisms. Similarly, *Far Cry: Primal* depicts ice age mammals as colossal,  
308 aggressive monsters, and in the case of some animals, such as mammoths, twice the size of their  
309 largest fossil remains; 3) Extreme monsterification can lead to a situation where ancient animals  
310 are indistinguishable from and/or confused with mythical creatures. In *ARK: Survival Evolved* a  
311 wide variety of ancient animals live alongside fictional animals such as wyverns, basilisks and  
312 gryphons that the player can also interact with and tame. In-game information and even  
313 achievements do not differentiate between the mythical and real animals which could lead to  
314 confusion for some players.

315        Monsterification of ancient animals is not the same trope as video game monster designs  
316 being heavily based on the appearance of ancient life. This is a very common trope in video  
317 games, with examples including *Monster Hunter Rise* (2021, CAPCOM), where many of the  
318 monsters clearly resemble theropod dinosaurs, and *Horizon Zero Dawn* (2017, Guerrilla Games)  
319 where a post-apocalyptic world is populated by an ecosystem of mechanical creatures loosely  
320 based upon extinct megafauna, including sauropod and theropod dinosaurs, as well as terror  
321 birds, giant crocodyliforms and cave hyenas.

322

### 323 3.2 Fossil = dinosaur = Tyrannosaurus: lack of palaeodiversity

324 Since their discovery in the 1800's, dinosaurs have captured the public imagination. Today, that  
325 popularity has continued, as dinosaurs dominate popular culture— so much so that they have  
326 become almost synonymous with ancient life in the entertainment industry. The video game  
327 industry is no different, with the vast majority of video games that incorporate ancient animals  
328 featuring only dinosaurs (Figure 3). The perpetuation of this trope poses a challenge to science  
329 communicators, as it instils a false impression to the audience of the lack of complexity to ancient  
330 ecosystems, as well as diminishing ancient diversity and species distribution through geological  
331 time and space.

332        Yet, even within this trope, the representation of dinosaur diversity is typically limited to a  
333 handful of 'iconic' dinosaur species that are perpetually recycled by the entertainment industry  
334 (Figure 4). Many of these species are well documented from North American fossil sites like the  
335 Morrison or Hell Creek Formation, such as *Tyrannosaurus*, *Stegosaurus*, *Triceratops*,  
336 *Brachiosaurus* etc., while other species that are commonly used are typically predatory (e.g.  
337 *Velociraptor*, *Spinosaurus* etc.). Within the video game industry, this recycling of dinosaurs serves  
338 a practical purpose: for smaller game developers, building new digital assets can be highly labour  
339 intensive and costly. It makes commercial sense to use pre-made, often free, resources (e.g. 3D



340 models, animations, sound effects and reference material) to recreate popular and recognisable  
341 dinosaurs, despite this further oversaturating their prevalence in the video game market place.  
342 Another group of ancient animals that falls within the overused trope are the 'ice-age' animal pair  
343 of the woolly mammoth (*Mammuthus primigenius*) and the sabre-toothed cat (*Smilodon sp.*). As  
344 charismatic mega-mammals often used in media, they are recognisable to the public and often  
345 used as more relatable monsters than dinosaurs in some video games (e.g. *Far Cry: Primal*; *The*  
346 *Elder Scrolls V: Skyrim*, 2011, Bethesda Game Studios).

347 However, in recent years, there is a growing number of games that use a greater diversity  
348 of dinosaur species as an active selling point to market the game. Park building games such as  
349 *Jurassic World: Evolution* allows the player to send teams of scientists to real world fossil sites to  
350 collect DNA from a host of lesser-known dinosaur species such as *Baryonyx*, *Huayangosaurus*,  
351 *Proceratosaurus*, *Carcharodontosaurus*, *Tsintaosaurus* etc. Dinosaur simulator games such as  
352 *Saurian* often feature lesser-known dinosaurs, while *Ark: Survival Evolved* features an abundance  
353 of relatively obscure dinosaurs (e.g. *Yutyranus*) but also Permian therapsids (e.g. *Moschops* and  
354 *Lystrosaurus*), Mesozoic birds (e.g. *Ichthyornis* and *Hesperornis*) and Cenozoic mammals (e.g.  
355 *Chalicotherium* and *Phiomia*). Although, many of these animals are still monsterified, and the  
356 game proves the point of this section by referring to every ancient animal in the game as a  
357 dinosaur in the in-game information.

358 As new games seek to find a niche within the gaming ecosystem, there are a number of  
359 popular video games that feature and draw attention to even more obscure palaeo-taxa and time  
360 periods. The hugely popular game, *Animal Crossing: New Horizons* tasked players with finding  
361 fossils for display within a local museum and in so doing introduced players to a variety of  
362 relatively niche groups such as *Anomalocaris*, *Acanthostega*, *Eusthenopteron* and  
363 *Myllokunmingia*. Interestingly, these fossils (and others found by the player) are displayed in a  
364 large phylogeny demonstrating evolutionary patterns in a simple but highly informative manner.  
365 Another game, *Abzû*, features a large number of obscure aquatic ancient animals such as  
366 ammonoids, *Anomalocaris*, *Arandaspis*, *Diplocaulus*, *Archelon* etc., although there is no context  
367 or distinction of where/when these organisms lived for the player. *Ancestors: The Humankind*  
368 *Odyssey* avoids this trope entirely by being specifically set in Miocene Africa, including a suite of  
369 time-specific organisms such as *Stegotetrabelodon*, *Machairodus* and *Enhydriodon*. All of these  
370 games introduce the player to organisms and concepts that they would have had limited (if any)  
371 exposure to in other types of media.

372

373 3.3 "Did you know...?": palaeotrivia and palaeodatabases.

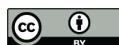

374 In order to help the player understand complex topics or to introduce elements of story, many  
375 video games feature in-built encyclopaedias or glossaries containing fact-files about characters,  
376 objects and locations integral to the game's setting. In games that feature palaeontological  
377 themes, fact files, databases, and bonus trivia provide the ideal opportunity for optional, longer-  
378 form, educational content that have the potential to inform and provoke further investigation from  
379 players, especially those who were not necessarily attracted to the game for the science.

380 In-game encyclopaedias can be extremely informative. This is particularly common in park  
381 management games such as *Jurassic World: Evolution* and the *Zoo Tycoon* series (2001–2017,  
382 Blue Fang Games) that feature highly detailed databases about each ancient animal that can be  
383 found in game, often incorporating facts pertaining to the organism such as where and when the  
384 animal was discovered as well as general information. This information is not necessary to play  
385 the game, but because such databases are detailed and well researched, they often add to the  
386 'scientific' aesthetic of these types of games and are useful educational tools.

387 More typically encountered is the usage of 'palaeo-facts' within different elements of the  
388 game. One excellent example is *Animal Crossing: New Horizons*, where Blathers, the strigiform  
389 museum curator, will regale the player with light-hearted but informative trivia about each fossil  
390 that is presented to the museum. Another example that is commonly employed is the use of  
391 'palaeo-facts' to entertain the player on loading screens (i.e. a picture the player must watch while  
392 the game is initialising). *LEGO Jurassic World* (2015, TT Fusion) uses this tactic to deliver bite-  
393 sized informative facts about many of the dinosaur species encountered in the game.

394 Generally speaking, the incorporation of 'palaeo-facts' and databases are a good resource  
395 for science communicators— assuming they are well researched and do not present  
396 misinformation as facts. *The Sims 4* is a perfect example of misinformation being presented  
397 alongside factual information. Various fossils can be found throughout the game world - including  
398 trace fossils, trilobites, plants, and raptor dinosaur claws. However, issues arise because other  
399 fossils items, ranging from the ridiculous (fossilised cow udders) to the bizarre ('perfectly  
400 preserved moustaches') are presented as genuine fossil remains. While clearly light-hearted and  
401 for comedic effect, the indiscriminate mixing of real and fake fossils is problematic and would not  
402 necessarily be discernible for all players.

403 Tangentially, many of the games mentioned in this section have large, dedicated player  
404 fan-bases who often form distinct online communities. In order to assist with completing aspects  
405 of the games, many players create, edit and maintain sizable publicly editable online 'wikis' (an  
406 online database resource). These online encyclopaedias not only provide game specific



407 information but often contain further reading and palaeo-trivia for interested players making them  
408 a useful educational resource, however, the degree of moderation and fact checking varies wildly.  
409

#### 410 *3.4 The depiction of palaeontological science*

411 The perception of palaeontology as a scientific discipline is difficult to gauge in computer games.  
412 Most palaeo-video games convey good palaeontological communication by explicitly integrating  
413 physical and biological processes into gameplay and world-building that will, either directly or  
414 indirectly, increase the knowledge of the player. However, most games typically focus on very  
415 specific aspects of palaeontology (e.g. fossil collection, genetics, evolution) and can take creative  
416 liberties in order to make engaging gameplay mechanics. This can mean that the player may get  
417 an inaccurate or misleading representation of palaeontological science. We discuss some of  
418 these below.

419

##### 420 *3.4.1 Geological processes*

421 Though it is often taken for granted, many open world video games heavily rely on aspects of  
422 climate, topography, biomes and even natural disasters to create realistic settings, the exploration  
423 of which can subtly communicate basic earth science to the player. For example, *American Truck*  
424 *Simulator* (2016, SCS Software) allows players to take virtual road trips across a scaled down  
425 version of the United States including many famous North American fossil localities (e.g. Dinosaur  
426 National Monument, Colorado, USA). **Enormous effort is taken to accurately capture the surface**  
427 **geology, flora and fauna and how climate varies from east to west.** Other games incorporate  
428 geological processes to build the game world for the player to explore. *Subnautica* (2018,  
429 Unknown Worlds Entertainment) is an underwater survival/horror game based in the crater of a  
430 guyot (a submerged volcanic seamount) on an alien planet. The explorable map is separated into  
431 distinct biomes, some of which contain large fossilised remains that have been preserved  
432 because of the specific environmental conditions of that area. The processes of how these fossils  
433 form (e.g. taphonomy) is explained to the player by scanning the fossils with scientific equipment  
434 in their inventory.

435 As computing power increases, greater graphical fidelity allows more accurate geological  
436 features to become standard in computer gaming and as a tangential effect this can be used by  
437 science communicators in engagement activities. During the recent COVID-19 pandemic, where  
438 travel was restricted, some academic institutions created virtual field trips for their students using  
439 technology commonly utilised by video gamers (e.g. VR headsets; Klippel *et al.* 2019).  
440 Furthermore, video game engines allow complex geological features to be explored in ways that



441 would be difficult for actual students in the field (e.g. utilising aerial imagery; Klippel *et al.* 2020).  
442 This demonstrates that video games have great potential for geological engagement, especially  
443 for players who are unable to access key sites due to travel restrictions or accessibility issues,  
444 not to mention the reduced environmental cost associated with virtual fieldwork.

445

#### 446 3.4.2 *Depicting evolution*

447 Evolution is a common theme in video games. It should be noted that the term 'evolution' is,  
448 however, used to encompass a host of different game mechanics that do not accurately represent  
449 the biological process and this may skew the player's understanding of the phenomenon. One  
450 example of the term 'evolution' being misused is as a levelling up mechanic. In the *Pokémon*  
451 franchise, the Pokémon 'evolve' into larger, more powerful forms as they gain more experience  
452 and level up, despite the process actually being a type of metamorphosis.

453 Another common misuse of the term evolution applies to games where novel  
454 morphological traits are acquired via predation. In *Spore* (2008, Maxis) players must guide the  
455 'evolution' of their own custom creatures from microscopic organisms to an interstellar empire by  
456 acquiring new evolutionary traits by scavenging them from the creatures they ingest. This  
457 depiction of 'evolution' is also seen in *E.V.O.: Search for Eden* (1992, Enix) where the main  
458 character begins as a generic fish, and must acquire teeth, jaws, limbs, and other features by  
459 eating prey items as they advance through levels inspired by different geological eras. This  
460 gameplay mechanic re-enforces the trope that evolutionary changes are a result of a conscious  
461 decision by an organism as opposed to random traits that are coincidentally beneficial (to better  
462 survive in the environment, for example) and thus are more likely to be passed to the next  
463 generation via natural selection.

464 Other games tackle evolution as a gradual process with greater nuance, however many  
465 of these games are limited by the need for fun game mechanics. In *Cell to Singularity: Evolution*  
466 *Never Ends* (2018, Computer Lunch) the player clicks or taps the screen to acquire currency,  
467 which is spent to advance Earth history in short steps. The game is presented as a branching tree  
468 with each node representing a new species or event, however the order in which evolutionary  
469 milestones are achieved is entirely arbitrary, presenting evolution as a simplified linear checklist  
470 of sequential events. Even games that accurately depict ancient organisms and past  
471 environments often portray the processes of evolution poorly. *Ancestors: The Humankind*  
472 *Odyssey* depicts the evolution of early humans as distinct leaps from one species to next as  
473 opposed to multiple species coexisting at the same time. Similarly, the game also refers to the  
474 levelling up mechanic of learning new skills and abilities, such as being able to use tools, as



475 'evolution'. By presenting evolution as an oversimplified, linear process, it also reinforces the  
476 outdated notion that humans are the pinnacle end product of evolution.

477 Conversely, some games approach evolution from a palaeontologist's perspective, using  
478 fossils to infer evolutionary patterns. In the puzzle game *Fossil Corner* (2021, Overfull Games),  
479 the player is given a box of procedurally generated fossils and is tasked with resolving their family  
480 tree by observing morphological character changes through each generation. This introduces the  
481 player to the concepts underlying maximum parsimony, a method to generate phylogenetic trees  
482 for extinct organisms commonly used by palaeontologists. As such, *Fossil Corner* is a good  
483 example of Digital Game Based Learning (DGBL).

484 While video games are potentially a great way to introduce players to the complex process  
485 of evolution, it should be remembered that COTS games must prioritise delivering engaging  
486 gameplay far above educational content.

487

#### 488 3.4.3 Cloning and resurrecting extinct animals

489 One aspect of palaeontological science that consistently arises in video games is cloning/de-  
490 extinction. The *Jurassic Park* (Crichton, 1990) franchise popularised the concept of extracting  
491 genetic information from fossiliferous material in order to clone ancient animals. This concept  
492 pervades video games based on the franchise such as *Jurassic World: Evolution* but is also  
493 prevalent in many other video games. For example, in *Terraria* (2011, Re-Logic), ancient amber  
494 is one of many natural resources that can be collected by the player and each piece has a tiny  
495 chance of containing a fossil mosquito. The player can then process the fossiliferous amber using  
496 an 'extractinator' to resurrect a pet baby dinosaur. In *Pokémon Red/Blue* the player receives a  
497 fossil as a reward and can take it to a laboratory on Cinnabar Island, where a scientist will  
498 resurrect the extinct Pokémon. This is taken to the extreme in *Pokémon Sword* and *Pokémon*  
499 *Shield* (2019, Game Freak), where the palaeontologists take the player's fossils, splice them  
500 together, and resurrect them into horrific, often unviable, chimaeras.

501 It is often not made clear to players that, currently, we are not able to 'resurrect' extinct  
502 animals, nor can we extract viable genetic material from fossils. Generally, there is very little  
503 nuance in video games regarding the depiction of the growing field of palaeo-proteomics (i.e., the  
504 study of ancient proteins) and the recent advances that have been made in the last decade (see  
505 Buckley *et al.* 2018). Furthermore, there is very little discussion in any video games about the  
506 ethical considerations of de-extinction and this should be considered by science communicators  
507 when discussing this popular and exciting field of science.

508



509                   3.4.4 *Keeping up with science*

510 Most media is dated by the science it is based on. A classic example is the *Jurassic Park*  
511 franchise, which was lauded for its exciting and scientifically accurate dinosaurs when the first  
512 film was released in 1993. However, as the series has progressed, it has chosen to maintain a  
513 distinct aesthetic rather than keeping up-to-date with the current scientific understanding.  
514 Similarly, while video games can be limited by graphical constraints (due to the computing power  
515 of the consoles or graphics cards they are designed for; see Figure 4), many games choose to  
516 be scientifically inaccurate because of the need for recycled assets or because they have a  
517 specific aesthetic (e.g. *Jurassic World: Evolution*). However, unlike other types of traditional  
518 media, modern video games do not necessarily need to suffer from ageing. This is because PC  
519 and (most) game consoles are connected to the internet, meaning game developers (and even  
520 fan communities) can issue updates and ‘mods’ (modifications) that update gameplay, graphics,  
521 or visual assets indefinitely after the games are released. Therefore, new fossil discoveries can  
522 be incorporated into game updates to keep games scientifically up-to-date. However, this relies  
523 on the game developer issuing updates, which may not be viable due to financial or time  
524 constraints. One example of this is *Animal Crossing: New Horizons*, which was released in March  
525 2020. The game contains a skeleton of *Spinosaurus* that the player can find, accession, and  
526 mount in their museum. Three weeks after the games release, however, Ibrahim *et al.* (2020) was  
527 published, which detailed a new *Spinosaurus* specimen from Morocco that had a previously  
528 unknown tail section that was of significant scientific and public interest. This hype caused  
529 considerable media interest in whether the game developers of *Animal Crossing*, Nintendo  
530 Entertainment Analysis & Development Division (EAD), would update the visual asset in line with  
531 this new discovery (Watts, 2020; Rochlin, 2020). As of publication, the *Spinosaurus* model in  
532 *Animal crossing* has not been updated.

533                   Inevitably, any released COTS video game will be overtaken by palaeontological  
534 advances and rendered out-dated, especially if developers are no longer working on updates for  
535 the game. From a science communication perspective, outdated game design can still be used  
536 to engage with the public, allowing scientists to communicate up-to-date science, but also the  
537 history of scientific thought, and to explore the ever-shifting process of scientific discovery, to our  
538 audiences.

539

540                   3.4.5 *Depicting palaeontological fieldwork*

541 Collecting raw materials is an extremely common game mechanic, and often many games use  
542 fossils as a resource. In most of these games, fossils are acquired by approaching specific types





543 of rock and breaking them with a tool (e.g. *The Sims 4*; *Stardew Valley*, *No Man's Sky*, etc.) or by  
544 digging holes in specific locations (e.g. *Animal Crossing: New Horizons* etc.) In *Red Dead*  
545 *Redemption 2*, fossils can just be collected off the ground (albeit often in hidden or difficult to  
546 reach locations) while fossils can be found in *Stardew Valley* by just fishing in streams in  
547 fossiliferous areas. Because fossil extraction is so common in video games, it can give the  
548 impression that fossil extraction is effortless and that fossils are a common occurrence in all rock  
549 types.

550 Some games do take a more nuanced approach to fossil collection. In *Starbound*, fossils  
551 can only be uncovered with specialised tools, such as brushes and rock hammers, and failure to  
552 carefully extract the fossil bearing rock permanently destroys the fossil. Once collected, fossils  
553 can be placed in customisable display cabinets at the player's base, which features a placard with  
554 basic trivia. *Tap! Dig! My Museum!* (2019, Oridio) is a mobile game where the player manages a  
555 museum, but also takes part in prospecting and excavating dinosaur skeletons. By tapping the  
556 screen, the player can remove layers of rocks piece by piece to find individual bone elements.  
557 Although highly stylised, the game does represent the processes of uncovering and transporting  
558 fossils in a fieldwork setting.

559

#### 560 3.4.6 Representation of ethics in palaeontological video games

561 Palaeontology has a long colonial history with deep rooted extractive and exploitative practises  
562 (Monarrez *et al.* 2021). Because many harmful practises (such as the erasure of indigenous  
563 contributions, the illegal acquisition/removal of fossil material from their country of origin by higher  
564 income countries, the refusal to repatriate fossil material, etc. — see Monarrez *et al.* 2021, Raja  
565 *et al.* 2021) are so ingrained within palaeontological science, they often appear within video  
566 games unchallenged with little objective analysis. For example, to clone more dinosaurs and  
567 expand your park in *Jurassic World: Evolution*, the player must send dig teams to sites across the  
568 globe to extract more fossil genetic material. These dig sites are based on real-world localities,  
569 which is a good educational tool. However, many of these sites have strict laws governing the  
570 removal and sale of fossils, for example Mongolia, where it has been illegal to remove fossils from  
571 the country for almost 100 years. This is ignored in gameplay, obscuring a complex legal and  
572 ethical situation which players could learn from.

573 One of the most contentious ethical issues facing palaeontology is the buying and selling  
574 of fossils (Shimada *et al.* 2014) especially in relation to the illegal exportation and smuggling of  
575 fossil material (e.g., Pérez Ortega, 2021) and the consequences of this illicit trade e.g. fuelling  
576 humanitarian crises in Myanmar (Dunne *et al.* 2021; Raja *et al.* 2021). It is extremely common for



577 video games to casually incorporate the selling of fossils into gameplay. In virtually every game  
578 featuring fossils as collectibles, excess fossils exist purely to be sold for profit. For example, in  
579 *Jurassic World: Evolution*, the game is designed so that any fossil found by the player that is not  
580 a dinosaur must be sold instantly to raise funds for the player. In the space exploration game *No  
581 Man's Sky* (2016, Hello Games), the players can journey between planets and can find fossils on  
582 the worlds they visit, however, these fossils serve no function other than to be sold for in-game  
583 currency. Even in games that otherwise represent museum curation and fossil finding in a positive  
584 and educational manner such as *Animal Crossing: New Horizons*, fossils are among the most  
585 financially valuable natural resources available. Once a fossil has been donated to the museum  
586 by the player, any duplicates found can be sold at the local market for in-game currency. These  
587 games do little to challenge unethical practises and normalise the commercialisation of  
588 fossiliferous material as a standard procedure within the palaeontological community. We  
589 therefore suggest that it is vital that science communicators are aware of this and incorporate  
590 issues such as ethical fossil extraction and fossil ownership into public engagement to counter  
591 this narrative where possible.

592

### 593 *3.5 Male, pale and stale: the depiction of palaeontologists in video games*

594 COTS video games introduce the public to palaeontologists and allied workers, however, the  
595 diversity of and representation of palaeontologists in video games is very limited.

596 Often scientists and/or palaeontologists are portrayed in video games as old, white men  
597 often resembling Charles Darwin (e.g. Professor Snail in *Stardew Valley* etc.). Another common  
598 trope is the perpetuation of the 'Indiana Jones stereotype' (Fitzpatrick, 2020). For example,  
599 *Dinosaur Fossil Hunter* (Demo released 2020, Pyramid Games) is a 'palaeontologist simulator'  
600 which aims to simulate fossil discovery, digging, and extraction (even tasking players with  
601 jacketing fossils in plaster). However, at the time of publication, the game uses only a white male  
602 character model to market the game — complete with stereotypical fedora. Not only does the  
603 reliance on these characters re-enforce the perception of palaeontology as a white male  
604 dominated science (Pancioli, 2017), but they also propagate the 'brilliant lone scientist' trope  
605 (Black, 2019), failing to showcase the collaborative work that is actual palaeontological science  
606 and fieldwork.

607 Some palaeo-video games do have more diverse casts. However, these characters are  
608 always able bodied, often poorly fleshed out characters, and are typically plagued with  
609 questionable motives and ethics. For example, in *Jurassic World: Evolution* the player must liaise  
610 with Dr Kajal Dua, the head of the science division. However, her character has almost no



611 backstory and often undermines her position as a scientist by tasking the player to undertake  
612 ethically dubious missions such as cloning dinosaurs specifically bred to be hyperaggressive  
613 when combatting other dinosaurs. Likewise, the cowboy simulator *Red Dead Redemption 2* has  
614 the player meet an older white woman digging up fossils on the American frontier of 1899. The  
615 player learns that she, like many women in the nineteenth century, has been rejected from several  
616 universities and that no other academics take her scientific ideas seriously. She resembles and  
617 is most likely inspired by Mary Anning, the most famous of the multitude of female  
618 palaeontologists overlooked by their male peers. After the player collects a number of fossils from  
619 across the game world to help her with her research, she assembles a biologically impossible  
620 chimaera, and reveals herself to have been a terrible scientist all along. The game could have  
621 included some genuine information about the infamous Bone Wars of early American  
622 palaeontology, and about women fighting for their place in science but, by including a female  
623 character who validates every rejection she was served, a potentially interesting characterisation  
624 and story (and the potential to educate players on such) was lost.

625 Historically and stereotypically, able bodied white men have dominated the narrative of  
626 palaeontology, and this in turn has shaped the depiction of palaeontologists in media, especially  
627 video games. The systematic lack of diversity in the earth sciences, especially palaeontology, is  
628 well known (Bernard & Cooperdock, 2018; Warnock *et al.* 2020). One potential aspect that  
629 contributes to the lack of diversity (amongst many) in palaeontology, is the lack of minority role  
630 models (Panciroli, 2017). The poor representation seen in COTS video games fails to counteract  
631 this — if minority players, who may be prospective students and future scientists, do not see role  
632 models represented in games and only see white male faces, they may be discouraged from  
633 pursuing their interest in earth science. This is especially relevant to games that are marketed as  
634 'palaeontologist simulators' but only contain white, able bodied, male characters.

635

### 636 *3.6 Perpetuation of harmful, misogynistic, and racist tropes in palaeo-games.*

637 Video games have a history of perpetuating problematic tropes, especially ableism, sexism,  
638 misogyny, and racism. Although these tropes are not specific to palaeo-video games, they do  
639 warrant attention from science communicators as they can have an impact on how palaeontology  
640 may be perceived by players.

641 A common problematic video gaming trope is the hypersexualisation of women (Beasley  
642 & Standley, 2002). Evidence shows that the negative representation of women in video games  
643 can have severe negative effects for female gamers including self-objectification and low levels  
644 of self-efficacy (see Gestos *et al.* 2018). One of the most egregious examples of casual



645 hypersexualisation seen in a palaeo-video game is found in *Trespasser* (1998, DreamWorks  
646 Interactive), where the player's character, Anne, is stranded on a dinosaur infested island. The  
647 game does not feature any visual cues for the player (i.e. health or ammunition counters) and so  
648 in order to check the health of the character, the player must actively look down to check a heart  
649 shaped tattoo on her breast that fades as the player is closer to death. Analysis has shown that  
650 hypersexualisation of women video game characters has decreased since the 1990s (Lynch *et*  
651 *al.* 2016), with a notable example being the de-sexualisation of Lara Croft, the protagonist of the  
652 *Tomb Raider* franchise, in recent games. While female lead characters are becoming more  
653 commonplace (e.g. Aloy, the lead character in *Horizon Zero Dawn*), it should be noted that Lynch  
654 *et al.* (2016) found COTS video games still typically depict female characters in secondary roles  
655 and that these characters are more sexualised than their male counterparts. Furthermore, within  
656 palaeontological video games, sexist and misogynistic tropes can also be coupled with racism  
657 often thanks in part to the perpetuation of the “lost world” fantasy genre which pervades palaeo-  
658 adjacent culture. Based on the Arthur Conan Doyle book *The Lost World* (1912), where an ancient  
659 ecosystem is found in the Amazon basin by white explorers, this genre combines palaeontology,  
660 colonialism, and the mystification and exotification of indigenous cultures (see Harrer 2018). Many  
661 aspects of this sub-genre are harmful, propagating damaging stereotypes, economic oppression,  
662 and cultural appropriation. Care should be taken by scientific communicators to not disseminate  
663 these damaging tropes if using video games as part of their engagement, but also take further  
664 action by actively highlighting and challenging these practises within our field.

665

#### 666 **4. Conclusion**

667 Video games are culturally prolific, and this sector is rapidly becoming one of the largest  
668 entertainment markets in the world. Palaeontological themed video games are extremely popular,  
669 and because of this, increasing numbers of the public are being exposed to ancient animals and  
670 palaeontological science, far eclipsing engagement efforts that can be undertaken by scientists  
671 and allied palaeo-workers. Many COTS video games have a positive impact on the audience and  
672 may promote an active interest in palaeontology. Many contain elements of good science  
673 communication; and some games, especially dinosaur simulators, strive for scientific accuracy.  
674 However, as with most types of media, palaeontological video games can contain a suite of  
675 negative and potentially damaging tropes. Many of these tropes are widespread issues in the  
676 gaming industry (e.g. poor representation, monsterification, hypersexualisation, etc.), but their  
677 presence in palaeontological video games specifically impacts their use as science  
678 communication tools. As science communicators we should undertake careful examination before



679 using specific COTS video games as educational tools. Furthermore, we should challenge  
680 harmful tropes in our engagement and outreach efforts to the public and, if possible, to COTS  
681 video game developers. By raising awareness of these damaging tropes, we can relegate them  
682 into extinction.

683

684 ***Acknowledgments:***

685 We would like to thank Edward McGowan and Jazmin Scarlett for inspiring this paper with their  
686 recent work on volcanoes in video games, and to Jazmin for fruitful discussions during the early  
687 draft phases of this paper. We also would like to thank the Palaeocast Gaming Network (PGN)  
688 Group for feedback and ideas. T.C. is funded by a Leverhulme Early Career Fellowship (ECF-  
689 2019-097). J.A. is supported by a Royal Society Research Grants for Research Fellows  
690 RGF\R1\181021. V.R. was supported by a Research Südtirol/Alto Adige grant (CUP  
691 H32F20000010003).

692

693 ***Author contributions:***

694 **Conceptualization:** Clements, Atterby. **Methodology:** Clements, Atterby, Cleary, Dearden,  
695 Rossi. **Investigation:** Clements, Atterby. **Formal analysis:** Clements, Atterby. **Resources:**  
696 Clements, Atterby, Cleary, Dearden, Rossi. **Data Curation:** Clements, Atterby. **Writing - Original**  
697 **Draft:** Clements, Atterby. **Writing - Review & Editing:** Clements, Atterby, Cleary, Dearden, Rossi.  
698 **Visualisation:** Clements, Atterby, Cleary, Dearden, Rossi. **Visualisation (figures):** Clements.  
699 **Supervision:** N/A. **Project administration:** Clements, Atterby. **Funding acquisition:** This  
700 project is not directly funded; however, T. Clements is funded by a Leverhulme Early Career  
701 Fellowship (ECF-2019-097). J.A. is supported by a Royal Society Research Grants for Research  
702 Fellows RGF\R1\181021. V.R. was supported by a Research Südtirol/Alto Adige grant (CUP  
703 H32F20000010003).

704

705 ***Competing interests.***

706 The authors declare that they have no conflict of interest.

707

708

709

710

711

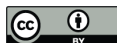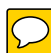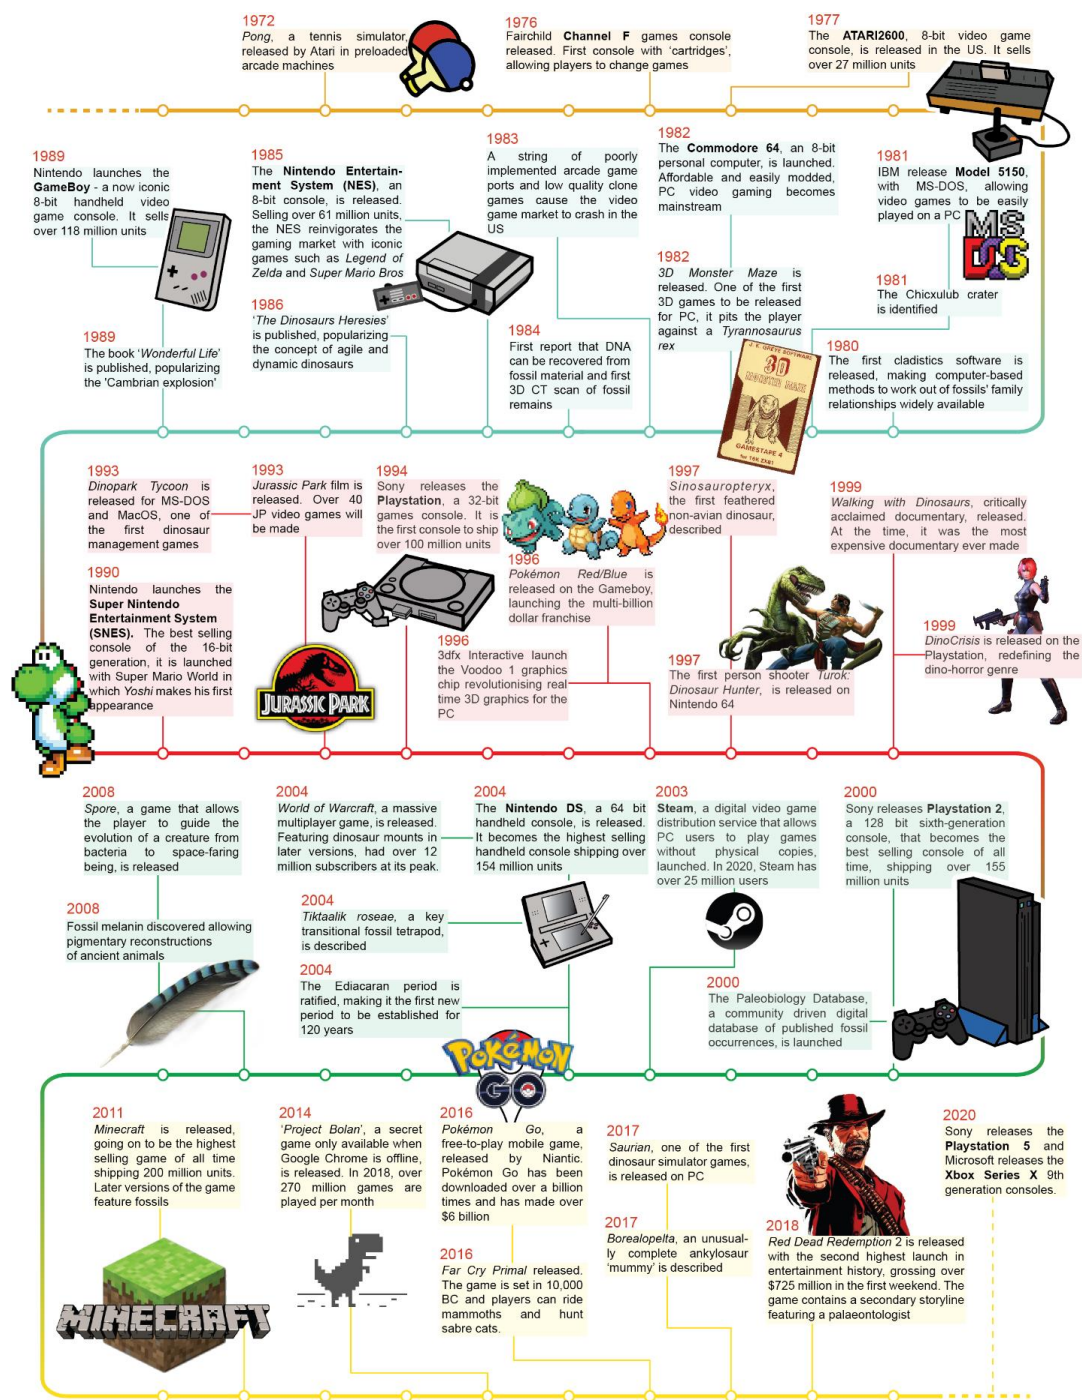

712

713 Figure 1. A timeline of major events in palaeontology, video games, and palaeontological video

714 games between 1970–2020.

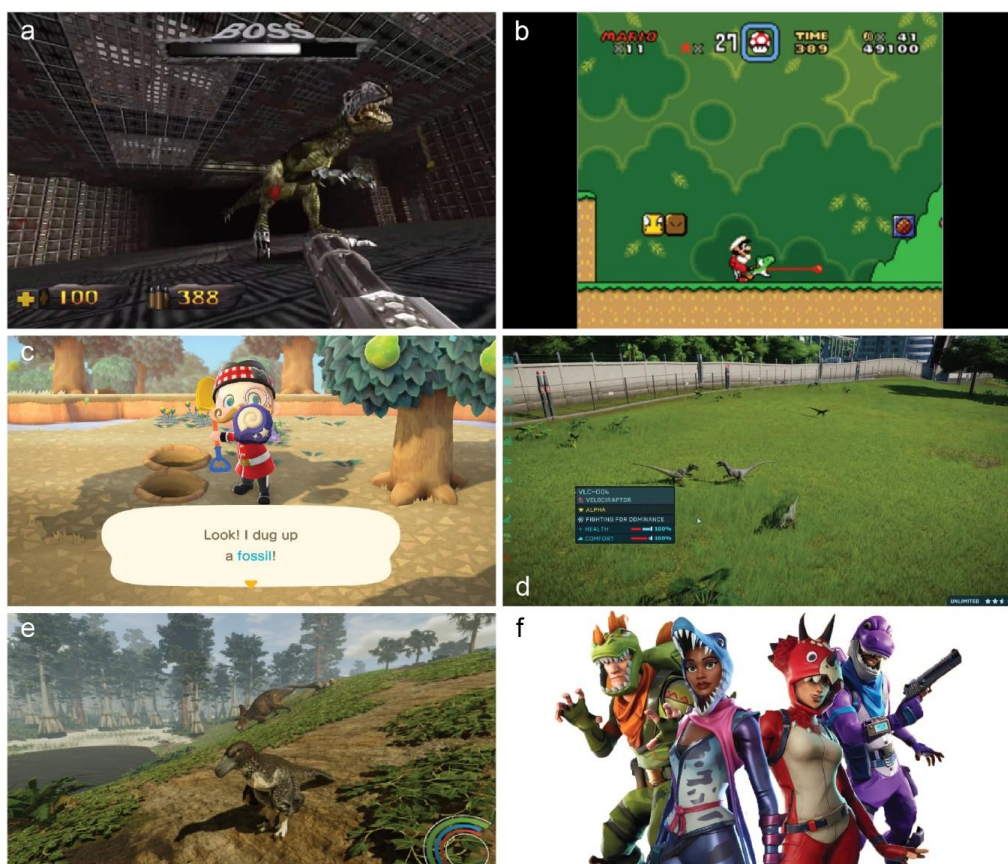

715 Figure 2. Screenshots of COTS video games that represent the 5 categories of palaeontological  
716 video games outlined in this paper. a) Ancient animals as adversaries. The player is fighting a  
717 cybernetically enhanced *Tyrannosaurus* armed with laser shooting ocular augments and fire  
718 breath in *Turok: Dinosaur Hunter* (1997, Iguana Entertainment). b) Ancient animals as tools. Mario  
719 riding Yoshi in *Super Mario World* (1990, Nintendo EAD). c) Fossils as collectables. The player  
720 discovers a fossil in *Animal Crossing: New Horizons* (2020, Nintendo EAD). d) Ancient animal  
721 management simulators. A paddock of velociraptors exhibiting modelled in-game behaviours (the  
722 alpha is fighting for dominance of the pack). *Jurassic World: Evolution* (2018, Frontier  
723 Developments). e) Ancient animal simulators. The player's avatar, a *Dakotaraptor*, sits near a  
724 water body while *Triceratops* and *Pachycephalosaur* graze in the background. *Saurian*, (2017,  
725 Urvogel Games, LLC). f) Examples of cosmetic items that are based on ancient animals from  
726 *Fortnite* (2017, Epic Games) - often these only change the players character models (and not  
727 core gameplay mechanics) and are known as 'skins'.  
728

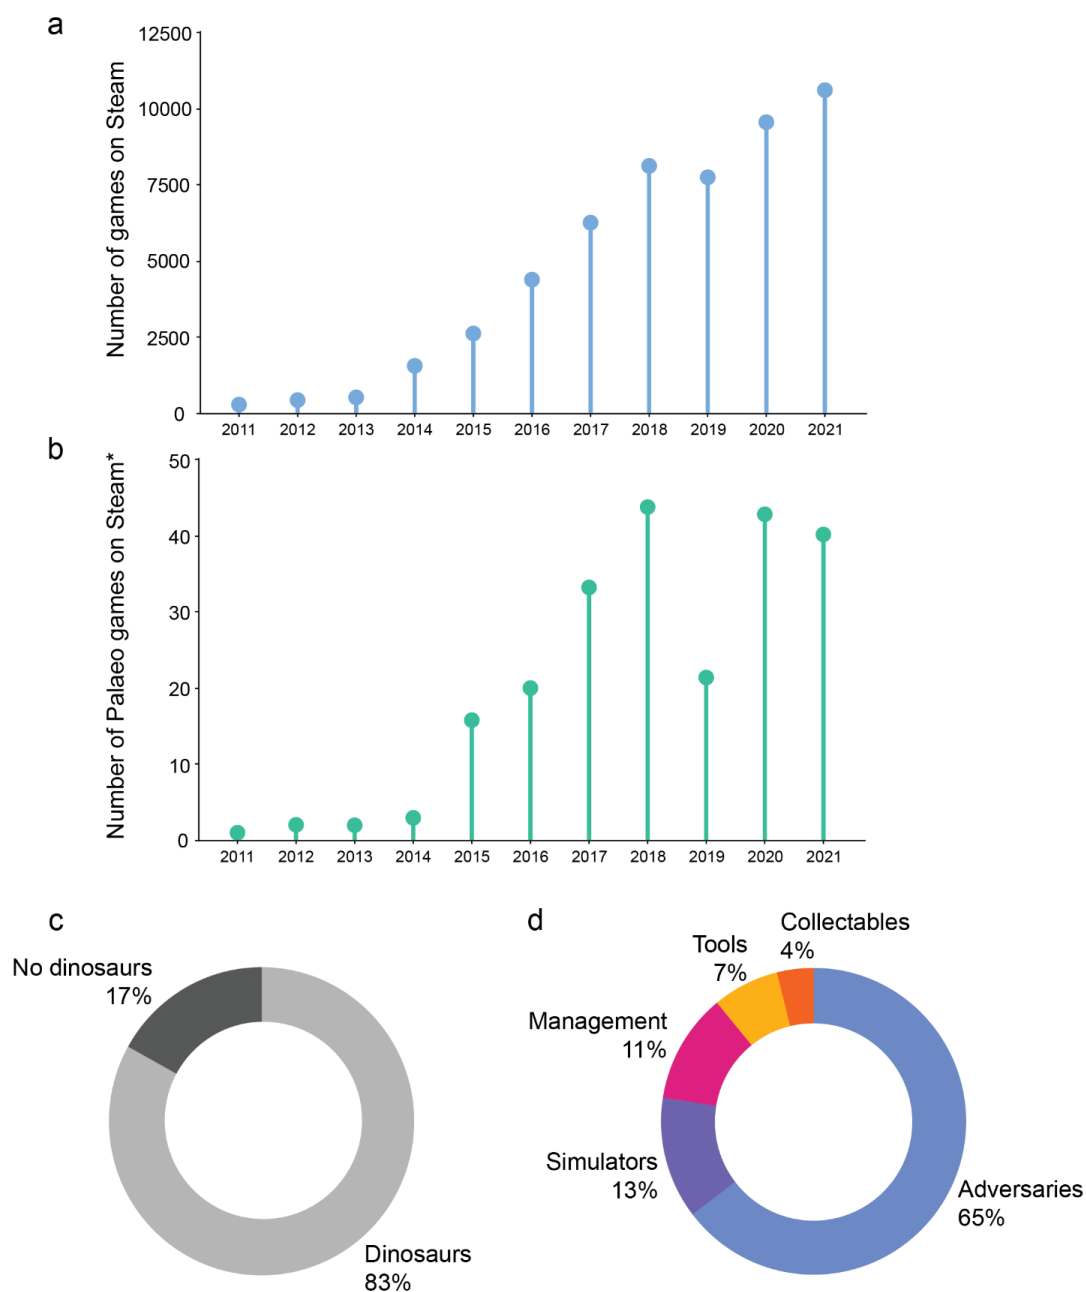

729

730 Figure 3. a) Number of PC games released per year on Steam, the largest video game digital  
731 distribution service. b) Number of games released that utilise palaeontological keyword 'tags' on  
732 Steam. c) Percentage of palaeontological COTS video games on Steam that contain dinosaurs  
733 versus those that only contain non-dinosaurian ancient animals (excluding crown group birds). d)





734 Breakdown of palaeontological COTS video games on Steam by categories identified in this  
735 paper. Source a: <https://steamdb.info/> (accessed March 2022). Source b, c, d: <https://statista.com>  
736 (accessed March 2022). A full list of the palaeontological COTS video games on Steam and 'tags'  
737 searched can be found in the supplementary material.  
738  
739  
740  
741  
742  
743  
744

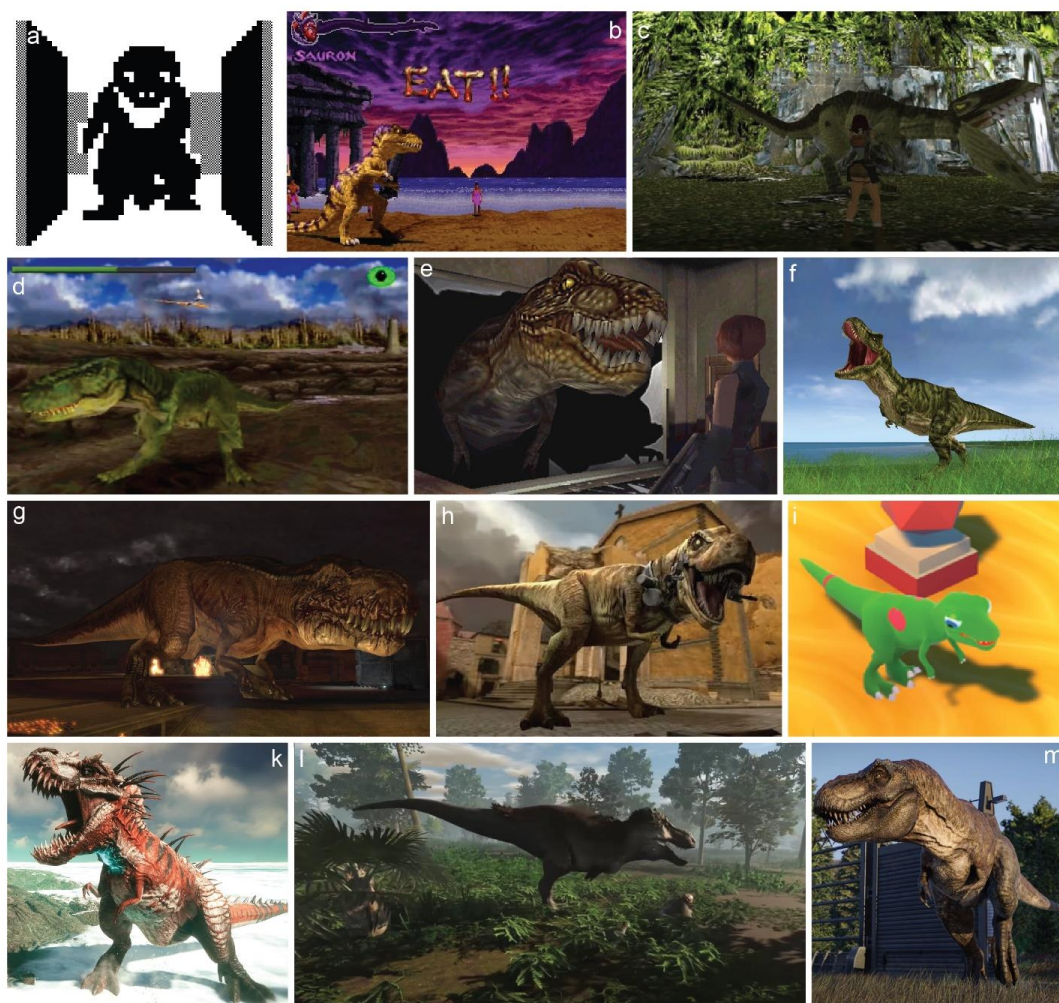

745  
746 Figure 4. The representation of *Tyrannosaurus rex* in COTS video games through time. a) 3D  
747 *Monster Maze* (1982, J. K. Greye Software). PC. b) *Primal Rage* (1994, Midway Games West  
748 Inc) Super Nintendo Entertainment System. c) *Tomb Raider* (1996, Core Design). Playstation. d)  
749 *The Lost World: Jurassic Park* (1997, DreamWorks Interactive). Playstation. e) *Dino Crisis* (1999,  
750 CAPCOM). Playstation. f) *Jurassic Park: Operation Genesis* (2003, Blue Tongue Entertainment).  
751 PC. g) *Turok* (2008, Propaganda Games). PC. h) *Dino D-Day* (2011, Digital Ranch). PC. i)  
752 *Parkasaurus* (2020, Washbear Studio). PC. j) *Second Extinction* (2020, Systemic Reaction). PC.  
753 k) *Saurian* (2017, Urvogel Games, LLC). PC. l) *Jurassic World: Evolution 2* (2021, Frontier  
754 Developments). PC.  
755



756 **References:**

- 757 Annetta, L.A., Video games in education: Why they should be used and how they are being used.  
758 *Theory into practice*, 47(3), pp.229-239. <https://doi.org/10.1080/00405840802153940>. 2008  
759
- 760 Bakker, R.T., The dinosaur heresies. William Morrow & Company, New York City, New York,  
761 USA, 1986.  
762
- 763 Beasley, B. and Collins Standley, T.. Shirts vs. skins: Clothing as an indicator of gender role  
764 stereotyping in video games. *Mass Communication & Society*, 5(3), pp.279-293.  
765 [https://doi.org/10.1207/S15327825MCS0503\\_3](https://doi.org/10.1207/S15327825MCS0503_3). 2002.  
766
- 767 Bernard, R.E., Cooperdock, E.H.G. No progress on diversity in 40 years. *Nature Geosci* 11, 292–  
768 295.. <https://doi.org/10.1038/s41561-018-0116-6>. 2018
- 769 Black, R. It's Time for the Heroic Male Paleontologist Trope to Go Extinct. *Slate*.  
770 <https://slate.com/technology/2019/04/what-the-new-yorker-dinosaur-story-gets-wrong.html>.  
771 2019. Accessed Feb 2022.
- 772 Brown, T., Li, H., Nguyen, A., Rivera, C. and Wu, A. Development of tangential learning in video  
773 games. Department of CIS, University of Pennsylvania, PA. 2014.  
774
- 775 Buckley M. Paleoproteomics: An Introduction to the Analysis of Ancient Proteins by Soft Ionisation  
776 Mass Spectrometry. In: Lindqvist C., Rajora O. (eds) *Paleogenomics. Population Genomics*.  
777 Springer, Cham. 2018.  
778
- 779 Caldwell, K.E.H., Osterweil, S., Urbano, C., Tan, P. and Eberhardt, R. "I Just Don't Know Where  
780 to Begin": Designing to Facilitate the Educational Use of Commercial, Off-the-Shelf Video Games.  
781 In *Serious games and edutainment applications* (pp. 625-648). Springer, Cham.DOI:  
782 10.1007/978-3-319-51645-5\_27. 2017.  
783
- 784 Charsky, D., & Mims, C. Integrating commercial off-the-shelf video games into  
785 school curriculums. *TechTrends*, 52(5), 38–44. 2008.  
786
- 787 Crichton, M. *Jurassic Park*. Alfred A. Knopf, New York City, New York, USA. 1990.  
788



- 789 Doyle, A. C. *The Lost World*. Hodder and Stoughton, London, UK. 1912.  
790
- 791 Dunne, E., Raja, N. B., Stewens, P. P., & Thein, Z. M. M. Ethics, law, and politics in  
792 palaeontological research: The case of Myanmar amber. <https://doi.org/10.31219/osf.io/awjex>.  
793 2018.  
794
- 795 Fitzpatrick, A. You Will Never Be Indiana Jones. *Lady Science*.  
796 [https://www.ladyscience.com/essays/you-will-never-be-indiana-jones-toxic-masculinity-](https://www.ladyscience.com/essays/you-will-never-be-indiana-jones-toxic-masculinity-archaeology)  
797 [archaeology](https://www.ladyscience.com/essays/you-will-never-be-indiana-jones-toxic-masculinity-archaeology). 2019. Accessed February 2022.  
798
- 799 Frensch, P.A. and Runger, D. Implicit learning. *Current directions in psychological science*, 12(1),  
800 pp.13-18. <https://doi.org/10.1111/1467-8721.01213>. 2003.  
801
- 802 Gestos, M., Smith-Merry, J., & Campbell, A. Representation of women in video games: a  
803 systematic review of literature in consideration of adult female wellbeing. *Cyberpsychology,*  
804 *Behavior, and Social networking*, 21(9), 535-541. <https://doi.org/10.1089/cyber.2017.0376>. 2018.  
805
- 806 Gould, S.J. *Wonderful life: the Burgess shale and the nature of history*. W. W. Norton & Co., New  
807 York City, New York, USA. 1989.  
808
- 809 Granic, I., Lobel, A., & Engels, R. C. The benefits of playing video games. *American psychologist*,  
810 69(1), 66. <https://doi.org/10.1037/a0034857>. 2014.  
811
- 812 Habgood, M.J. and Ainsworth, S.E. Motivating children to learn effectively: Exploring the value of  
813 intrinsic integration in educational games. *The Journal of the Learning Sciences*, 20(2), pp.169-  
814 206. <https://doi.org/10.1080/10508406.2010.508029>. 2011.  
815
- 816 Harrer, S. Casual empire: Video games as neocolonial praxis. *Open Library of Humanities*, 4(1).  
817 <https://doi.org/10.16995/olh.210>. 2018.  
818
- 819 *Jurassic Park*, Directed By: Steven Spielberg. Universal Pictures, Universal City, California, USA,  
820 1993.  
821



- 822 Klippel, Alexander, Jiayan Zhao, Kathy Lou Jackson, Peter La Femina, Chris Stubbs, Ryan  
823 Wetzel, Jordan Blair, Jan Oliver Wallgrün, and Danielle Oprean. Transforming Earth Science  
824 Education Through Immersive Experiences: Delivering on a Long Held Promise. *Journal of*  
825 *Educational Computing Research* 57, no. 7. 1745–71.  
826 <https://doi.org/10.1177/0735633119854025>. 2019.
- 827
- 828 Klippel, A., Zhao, J., Oprean, D., Wallgrün, J. O., Stubbs, C., La Femina, P., & Jackson, K. L. The  
829 value of being there: Toward a science of immersive virtual field trips. *Virtual Reality*, 24(4), 753-  
830 770. <https://doi.org/10.1007/s10055-019-00418-5>. 2020
- 831
- 832
- 833 Klopfer, E. and Osterweil, S. The boom and bust and boom of educational games. In: Pan Z.,  
834 Cheok A.D., Müller W., Liarakapis F. (eds) *Transactions on Edutainment IX. Lecture Notes in*  
835 *Computer Science*, vol 7544. Springer, Berlin, Heidelberg. DOI: 10.1007/978-3-642-37042-7\_21.  
836 2013.
- 837
- 838 Kerawalla, L. and Crook, C. From promises to practices: The fate of educational software in the  
839 home. *Technology, Pedagogy and Education*, 14(1), pp.107-125.  
840 <https://doi.org/10.1080/14759390500200195>. 2005.
- 841
- 842 Mani, L., Cole, P.D. and Stewart, I. Using video games for volcanic hazard education and  
843 communication: an assessment of the method and preliminary results. *Natural Hazards and Earth*  
844 *System Sciences*, 16(7), pp.1673-1689. <https://doi.org/10.5194/nhess-16-1673-2016>. 2016.
- 845
- 846 Newzoo Global Games Market Report, 2020. Available at: <https://newzoo.com/>. Accessed:  
847 February 2021.
- 848
- 849 Lynch, T., Tompkins, J. E., Van Driel, I. I., & Fritz, N. Sexy, strong, and secondary: A content  
850 analysis of female characters in video games across 31 years. *Journal of Communication*, 66(4),  
851 564-584. <https://doi.org/10.1111/jcom.12237>. 2016.
- 852
- 853 McCullough, K. M., Wong, Y. J., & Stevenson, N. J. Female video game players and the protective  
854 effect of feminist identity against internalized misogyny. *Sex Roles*, 82(5), 266-276.  
855 <https://doi.org/10.1007/s11199-019-01055-7>. 2020.



856

857 McGowan, E.G. and Scarlett, J.P. Volcanoes in video games: the portrayal of volcanoes in  
858 commercial off-the-shelf (COTS) video games and their learning potential. *Geoscience*  
859 *Communication*, 4(1), pp.11-31. <https://doi.org/10.5194/gc-4-11-2021>. 2021.

860

861 Mohanty, S.D. and Cantu, S. Teaching introductory undergraduate physics using commercial  
862 video games. *Physics Education*, 46(5), p.570. <https://doi.org/10.1088/0031-9120/46/5/009>.  
863 2011.

864

865 Monarrez, P.M., Zimmt, J.B., Clement, A.M., Gearty, W., Jacisin, J.J., Jenkins, K.M., Kusnerik,  
866 K.M., Poust, A.W., Robson, S.V., Sclafani, J.A. and Stilson, K.T. Our past creates our present: a  
867 brief overview of racism and colonialism in Western paleontology. *Paleobiology*, pp.1-13.  
868 doi:10.1017/pab.2021.28. 2021.

869

870 Mozelius, P., Fagerström, A. and Söderquist, M. Motivating Factors and Tangential Learning for  
871 Knowledge Acquisition in Educational Games. *Electronic Journal of e-Learning*, 15(4), pp.343-  
872 354. 2017.

873

874 Pancrioli, E. Beards and Gore-Tex: does palaeontology have an image problem? *The Guardian*.  
875 [https://www.theguardian.com/science/2017/aug/16/beards-and-gore-tex-does-palaeontology-](https://www.theguardian.com/science/2017/aug/16/beards-and-gore-tex-does-palaeontology-have-an-image-problem)  
876 [have-an-image-problem](https://www.theguardian.com/science/2017/aug/16/beards-and-gore-tex-does-palaeontology-have-an-image-problem). 2017. Accessed: December 2021.

877

878 Pérez Ortega, R. 2021. 'It's like a second extinction': Retraction deepens legal and ethical battle  
879 over rare dinosaur. *Science*. [https://www.science.org/content/article/it-s-second-extinction-](https://www.science.org/content/article/it-s-second-extinction-retraction-deepens-legal-and-ethical-battle-over-rare-dinosaur)  
880 [retraction-deepens-legal-and-ethical-battle-over-rare-dinosaur](https://www.science.org/content/article/it-s-second-extinction-retraction-deepens-legal-and-ethical-battle-over-rare-dinosaur). 2021 Accessed: December 2021.

881

882 Pringle, J.K., Bracegirdle, L. and Potter, J.A. Educational forensic e-gaming as effective learning  
883 environments for Higher Education students. In *Forensic Science Education and Training: A Tool-*  
884 *Kit for Lecturers and Practitioner Trainers*. Edited by Anna Williams, John P. Cassella, and Peter  
885 D. Maskell. John Wiley & Sons Ltd. p.119-136. 2017.

886

887 Raja, N. B., Dunne, E. M., Matiwane, A., Khan, T. M., Nätscher, P. S., Ghilardi, A. M., &  
888 Chattopadhyay, D. Colonial history and global economics distort our understanding of deep-time  
889 biodiversity. *Nature ecology & evolution*, 1-10. <https://doi.org/10.1038/s41559-022-01682-6>. 2021



890  
891 Rochlin, J. Animal Crossing: New Horizons Fans Want the Spinosaurus Skeleton to Be Updated.  
892 *Gamerant*.  
893 [https://gamerant.com/animal-crossing-new-horizons-spinosaurus-fossil-update-science-](https://gamerant.com/animal-crossing-new-horizons-spinosaurus-fossil-update-science-paleontology/)  
894 [paleontology/](https://gamerant.com/animal-crossing-new-horizons-spinosaurus-fossil-update-science-paleontology/) 2020. Accessed February 2022.  
895  
896 Shute, V.J., Ventura, M. and Kim, Y.J. Assessment and learning of qualitative physics in Newton's  
897 playground. *The Journal of Educational Research*, 106(6), pp.423-430.  
898 <https://doi.org/10.1080/00220671.2013.832970>. 2013.  
899  
900 Shimada, Kenshu, Currie, Philip J., Scott, Eric, and Sumida, Stuart S. The greatest challenge to  
901 21st century paleontology: When commercialization of fossils threatens the science.  
902 *Palaeontologia Electronica* Vol. 17, Issue 1; 1E: 4. <https://doi.org/10.26879/141>. 2014.  
903  
904 Stream Hatchet Video Game Streaming Trends Report, 2020  
905 <https://insights.streamhatchet.com/stream-hatchet-2020-yearly-report-1>  
906  
907 Sun, C.T., Ye, S.H. and Wang, Y.J. Effects of commercial video games on cognitive elaboration  
908 of physical concepts. *Computers & Education*, 88, pp.169-181.  
909 <https://doi.org/10.1016/j.compedu.2015.05.002>. 2015.  
910  
911 Van Eck, R. Digital game-based learning: It's not just the digital natives who are restless.  
912 *EDUCAUSE review*, 41(2), p.16. 2006.  
913  
914 Walking with Dinosaurs, Created By: Tim Haines. BBC Natural History Unit, London, UK, 1996.  
915  
916 Warnock, R., Dunne, E., Giles, S., Saupe, E., Soul, L., & Lloyd, G. Are we reaching gender parity  
917 among Palaeontology authors? <https://doi.org/10.31219/osf.io/9puje>. 2020.  
918  
919 Watts, S. Animal Crossing Fossil Is Already Rendered Inaccurate After New Discovery.  
920 *Gamespot*. [https://www.gamespot.com/articles/animal-crossing-fossil-is-already-rendered-](https://www.gamespot.com/articles/animal-crossing-fossil-is-already-rendered-inaccur/1100-6476642/)  
921 [inaccur/1100-6476642/](https://www.gamespot.com/articles/animal-crossing-fossil-is-already-rendered-inaccur/1100-6476642/). 2020. Accessed February 2022.  
922  
923 -----

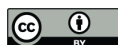

924

925 Games referenced in this paper:

926

927 *3D Monster Maze*. Sinclair ZX81. J. K. Greye Software, Bristol, UK. 1982

928 *Abzû*. Microsoft Windows, Nintendo Switch, Playstation 4, Xbox One. Giant Squid Studios, Santa  
929 Monica, California, USA, 2016.

930 *American Truck Simulator*. Linux, macOS, Microsoft Windows. SCS Software, Prague, Czechia,  
931 2016.

932 *Ancestors: The Humankind Odyssey*. Microsoft Windows, Playstation 4, Xbox One. Panache  
933 Digital Games, Montreal, Canada, 2019.

934 *Animal Crossing: New Horizons*. Nintendo Switch. Nintendo Entertainment Analysis &  
935 Development Division (EAD), Kyoto, Japan. 2020.

936 *Ark: Survival Evolved*. Android, iOS Linux, macOS, Microsoft Windows, Nintendo Switch,  
937 Playstation 4, Xbox One. Studio Wildcard, Redmond, Washington, USA, 2017.

938 *Assassin's Creed: Origins*. Microsoft Windows, Playstation, Xbox One.. Ubisoft Montreal,  
939 Montreal, Canada, 2017.

940 *Batman: Arkham City*. Microsoft Windows, PlayStation 3, PlayStation 4, Xbox 360, Xbox One, Wii  
941 U. Rocksteady Studios, London, UK. 2011.

942 *Battlefield 4*. Microsoft Windows, PlayStation 3, PlayStation 4, Xbox 360, Xbox One. DICE,  
943 Stockholm, Sweden. 2013.

944 *Beasts of Bermuda* Microsoft Windows. Sastrei Studios, LLC, Raleigh, North Carolina, USA,  
945 2018.

946 *BioShock*. Microsoft Windows, PlayStation 3, Xbox 360. 2K Boston, Westwood, Massachusetts,  
947 USA. 2007.

948 *Carnivores: Dinosaur Hunter (Reborn)* Microsoft Windows. Digital Dreams Entertainment LLC,  
949 Chicago, USA. 2015.

950 *Cell to Singularity: Evolution Never Ends*. Android, iOS, Microsoft Windows, macOS. Computer  
951 Lunch, New York City,, New York, USA, 2018

952 *Destiny 2*. Microsoft Windows, PlayStation 4, PlayStation 5, Xbox One, Xbox Series X and Series  
953 S. Bungie Inc, Bellevue, Washington, USA. 2017.

954 *Dino Crisis*. Dreamcast, Microsoft Windows, PlayStation, PlayStation 2, Xbox. CAPCOM, Osaka,  
955 Japan. 1999.

956 *Dino D-Day*. Microsoft Windows. 800 North & Digital Ranch, Burbank, California, USA. 2011.

957 *Dino Stalker*. Playstation 2. CAPCOM, Osaka, Japan. 2002.



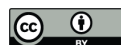

- 958 *DinoPark Tycoon*. MacOS, MS-DOS. Manley & Associates, Issaquah, Washington, USA, 1993.
- 959 *DinoRun DX*. macOS, Microsoft Windows. PixelJAM Games, Asheville, North Carolina, USA,  
960 2015.
- 961 *Dinosaur Fossil Hunter (Demo)*. Microsoft Windows. Pyramid Games, Lublin, Poland, 2020.
- 962 *Dinosaur Hunt*. Microsoft Windows. Racing Bros. 2015
- 963 *Dinosaurs: Prehistoric Survivors*. Microsoft Windows. Arcupion Art, Jakarta, Indonesia, 2018.
- 964 *E.V.O.: Search for Eden*. Super Nintendo Entertainment System. Enix, Tokyo, Japan, 1992.
- 965 *Far Cry Primal*. Microsoft Windows, Playstation 4, Xbox One. Ubisoft Montreal, Montreal, Canada,  
966 2016.
- 967 *Fortnite*. Microsoft Windows, PlayStation 4, PlayStation 5, Xbox One, Xbox Series X and Series  
968 S. Epic Games, Cary, North Carolina, USA. 2017.
- 969 *Fossil Corner*. macOS, Microsoft Windows. Overfull Games, Chicago, Illinois, 2021.
- 970 *Fossil Fighters*. Nintendo DS. Nintendo Switch. Nintendo Entertainment Analysis & Development  
971 Division (EAD), Kyoto, Japan. 2008.
- 972 *Horizon Zero Dawn*. Microsoft Windows, Playstation 4. Guerrilla Games, Amsterdam,  
973 Netherlands, 2017.
- 974 *Hunt: Primal Reptiles*. Microsoft Windows. HugeLittleStudio, 2020.
- 975 *Jurassic Park Builder*. Android, Facebook, iOS. Ludia, Montreal, Canada, 2012
- 976 *Jurassic Park III: Park Builder*. Game Boy Advance. Konami, Tokyo, Japan. 2001
- 977 *Jurassic Park: Operation Genesis*. Microsoft Windows, Playstation 2, Xbox. Blue Tongue  
978 Entertainment, Melbourne, Australia, 2003.
- 979 *Jurassic World: Evolution* Microsoft Windows, Playstation 4, Xbox One. Frontier Developments,  
980 Cambridge, UK. 2018.
- 981 *Jurassic World: Evolution 2* Microsoft Windows, Playstation 4, Playstation 5, Xbox One, Xbox  
982 Series X and Series S. Frontier Developments, Cambridge, UK. 2021.
- 983 *LEGO Jurassic World*. Android, iOS, macOS, Microsoft Windows, Nintendo 3DS, Nintendo  
984 Switch, Playstation 3, Playstation 4, Xbox 360, Xbox One, Wii U. TT Games, Maidenhead, UK,  
985 2015.
- 986 *Minecraft*. Microsoft PC, Nintendo Switch, PlayStation 3, PlayStation 4, Xbox 360, Xbox One, Wii  
987 U. Mojang Studios, Stockholm, Sweden. 2011.
- 988 *Monster Hunter Rise*. Microsoft Windows, Nintendo Switch. Capcom, Osaka, Japan, 2021.
- 989 *Nanosaur*. iOS, MacOS, Microsoft Windows. Ideas From The Deep, Little Elm, Texas, 1998.
- 990 *No Man's Sky*. Microsoft Windows, Nintendo Switch, Playstation 4, Playstation 5, Xbox One, Xbox  
991 Series X and Series S. Hello Games, Guildford, UK, 2016.



- 992 *Orion Prelude*. Microsoft Windows. DANKIE, 2012
- 993 *Parkasaurus*. Microsoft Windows. Washbear Studio, Canada, 2020
- 994 *Path Of Titans*. Android, iOS, Linux, macOS, Microsoft Windows. Alderon Games, Victoria,  
995 Australia, 2020
- 996 *Peter Jackson's King Kong: The Official Game of the Movie*. Game Boy Advance, GameCube,  
997 Microsoft Windows, Nintendo DS, PlayStation 2, Xbox, Xbox 360. Ubisoft Montpellier, Castelnau-  
998 le-Lez, France. 2005.
- 999 *Pokémon Blue*. Game Boy, Game Boy Advance, Nintendo 3DS. Game Freak, Tokyo, Japan,  
1000 1999.
- 1001 *Pokémon Go*. Android, iOS. Niantic, San Francisco, California, USA. 2016.
- 1002 *Pokémon Red*. Game Boy, Game Boy Advance, Nintendo 3DS. Game Freak, Tokyo, Japan,  
1003 1999.
- 1004 *Pokémon Shield*. Nintendo Switch. Game Freak, Tokyo, Japan, 2019.
- 1005 *Pokémon Sword*. Nintendo Switch. Game Freak, Tokyo, Japan, 2019.
- 1006 *Prehistoric Hunt* Microsoft Windows. Antiproto Studios, Kouvola, Finland. 2020.
- 1007 *Primal Carnage*. Microsoft Windows. Lukewarm Media, Henderson, Nevada, USA, 2012.
- 1008 *Primal Rage*. Super Nintendo Entertainment System. Midway Games West Inc, Milpitas,  
1009 California, USA. 1994.
- 1010 *Project Bolan (Dinosaur Game)*. Google Chrome. Google, Menlo park, California, USA. 2014.
- 1011 *Red Dead Redemption 2*. Microsoft Windows, Playstation 4, Xbox One. Rockstar Games, New  
1012 York City, New York, USA, 2018.
- 1013 *Robinson: The Journey*. Microsoft Windows, Playstation 4. Crytek, Frankfurt, Germany, 2016.
- 1014 *Saurian*. Linux, MacOS, Microsoft Windows. Urvogel Games, LLC, Saint Paul, Minnesota, 2017.
- 1015 *Second Extinction*. Xbox One, Xbox Series X and Series S, Microsoft Windows, Systemic  
1016 Reaction, Stockholm, Sweden. 2020.
- 1017 *Spore* macOS, Microsoft Windows. Maxis, Walnut Creek, California, USA. 2008
- 1018 *Starbound*. Linux, macOS, Microsoft Windows, Playstation 4, Xbox One. Chucklefish, London,  
1019 UK, 2016.
- 1020 *Stardew Valley*. Android, iOS, Linux, macOS, Microsoft Windows, Nintendo Switch, Playstation  
1021 4, Xbox One. ConcernedApe, Seattle, Washington, 2016.
- 1022 *Subnautica*. Microsoft Windows, Playstation 4, Playstation 5, Xbox One, Xbox Series X and  
1023 Series S. Unknown Worlds Entertainment, San Francisco, California, USA, 2018.
- 1024 *Super Mario World*. Super Nintendo Entertainment System. Nintendo Entertainment Analysis &  
1025 Development Division (EAD), Kyoto, Japan. 1990.



- 1026 *Tap! Dig! My Museum!* Android, iOS. Oridio, Tokyo, Japan, 2019.
- 1027 *Terraria*. Android, iOS, Nintendo Switch, Playstation 4, Xbox One. Re-Logic, Floyds Knobs,  
1028 Indiana, USA, 2011.
- 1029 *The Archotek Project*. Linux, MacOS, Microsoft Windows. The Archotek Project Team, 2017
- 1030 *The Beasts of 9500*. Microsoft Windows. Dragons, 2020.
- 1031 *The Elder Scrolls V: Skyrim*. Microsoft Windows, PlayStation 4, PlayStation 5, PlayStation 3, Xbox  
1032 360, Xbox One, Xbox Series X and Series S. Bethesda Game Studios, Rockville, Maryland, USA,  
1033 2011.
- 1034 *The Last Of Us Part II*. Playstation 4. Naughty Dog, Santa Monica, California, 2020.
- 1035 *The Legend of Zelda*. Nintendo Entertainment System. Nintendo Entertainment Analysis &  
1036 Development Division (EAD), Kyoto, Japan. 1986.
- 1037 *The Lost World: Jurassic Park*. Playstation, Sega Saturn. DreamWorks Interactive, Los Angeles,  
1038 USA. 1997
- 1039 *The Sims 4*. macOS, Microsoft Windows, PlayStation 4, Xbox One. Maxis, Walnut Creek,  
1040 California, USA. 2014
- 1041 *Tomb Raider* Microsoft Windows, Playstation, Sega Saturn. Core Design, Derby, UK. 1996.
- 1042 *Tomb Raider II* Windows, Playstation. Core Design, Derby, UK. 1997.
- 1043 *Total War: Warhammer I*. Linux, MacOS, Microsoft Windows. Creative Assembly, Horsham, UK,  
1044 2016.
- 1045 *Total War: Warhammer II*. Linux, MacOS, Microsoft Windows. Creative Assembly, Horsham, UK,  
1046 2017.
- 1047 *Trespasser*. Microsoft Windows. DreamWorks Interactive, Los Angeles, USA. 1998
- 1048 *World of Warcraft: Battle for Azeroth*. Linux, MacOS, Microsoft Windows. Blizzard Entertainment,  
1049 Irvine, California, USA, 2018
- 1050 *Wrath of the Goliaths: Dinosaurs* Microsoft Windows. Ascendence Studios, 2018. *Turok: Dinosaur*  
1051 *Hunter*. Nintendo64, Microsoft Windows. Iguana Entertainment, Austin, Texas, USA. 1997.
- 1052 *Yoshi's Story*, Nintendo64. Nintendo Entertainment Analysis & Development Division (EAD),  
1053 Kyoto, Japan. 1997.
- 1054 *Zoo Tycoon* series. macOS, Microsoft Windows. Blue Fang Games, Waltham, Massachusetts,  
1055 USA, 2001-2017.
- 1056 *Zoo Tycoon: Dinosaur Digs*. macOS, Microsoft Windows. Blue Fang Games, Waltham,  
1057 Massachusetts, USA, 2002.
- 1058
